# Supplementary material for: Synthesis, Structure and Stereochemistry of Dispirocompounds Based on Imidazothiazolotriazine and Pyrrolidineoxindole
Source: MDPI journal article supplement (doi:10.3390/ijms232213820), 2022-11-10

# Supplementary Information

## Synthesis, Structure and Stereochemistry of Dispirocompounds Based on Imidazothiazolotriazine and Pyrrolidineoxindole

Alexei N. Izmes't'ev <sup>1</sup>, Valentina A. Karnoukhova <sup>2</sup>, Alexander A. Larin <sup>1</sup>, Angelina N. Kravchenko <sup>1</sup>, Leonid L. Fershtat <sup>1</sup> and Galina A. Gazieva <sup>1,\*</sup>

<sup>1</sup> N. D. Zelinsky Institute of Organic Chemistry, Russian Academy of Sciences, 47 Leninsky Prosp., Moscow 119991, Russia

<sup>2</sup> A. N. Nesmeyanov Institute of Organoelement Compounds, Russian Academy of Sciences, 28 Vavilova Street, Moscow 119991, Russia

\* Correspondence: gaz@ioc.ac.ru

### Table of Contents

|                                                                                                                                                 |     |
|-------------------------------------------------------------------------------------------------------------------------------------------------|-----|
| 1. Column chromatography .....                                                                                                                  | S2  |
| 2. Crystallographic data for <b>3a</b> , <b>4e</b> and <b>7c</b> .....                                                                          | S3  |
| 3. Spectra <sup>1</sup> H and <sup>13</sup> C NMR of compounds <b>3a-e</b> and { <sup>1</sup> H- <sup>1</sup> H} NOESY NMR of <b>3a,b</b> ..... | S4  |
| 4. Spectra <sup>1</sup> H and <sup>13</sup> C NMR of compounds <b>4a-e</b> .....                                                                | S16 |
| 5. Spectra <sup>1</sup> H and <sup>13</sup> C NMR of compounds <b>6a-e</b> and { <sup>1</sup> H- <sup>1</sup> H} NOESY NMR of <b>6a</b> .....   | S26 |
| 6. Spectra <sup>1</sup> H and <sup>13</sup> C NMR of compounds <b>7a-e</b> and { <sup>1</sup> H- <sup>1</sup> H} NOESY NMR of <b>7b</b> .....   | S37 |

## Column chromatography

Column chromatography was carried out with silica gel (Acros Silica gel, for column chromatography, 60 Angstrom pore size, 0.040–0.063 mm) and to monitor the preparative separations, analytical thin layer chromatography (TLC) was performed at room temperature on pre-coated 0.25 mm thick silica gel 60 F<sub>254</sub> aluminum plates 20 × 20 cm Merck, Darmstadt, Germany. Propanol-2 was used as eluent without preliminary purification.

Example of preparative separation of a mixture of diastereomers **3a** and **4a** using column chromatography. Chromatograms of the collected fractions of diastereomers **3a** ( $R_f = 0.21$ ) and **4a** ( $R_f = 0.53$ ).

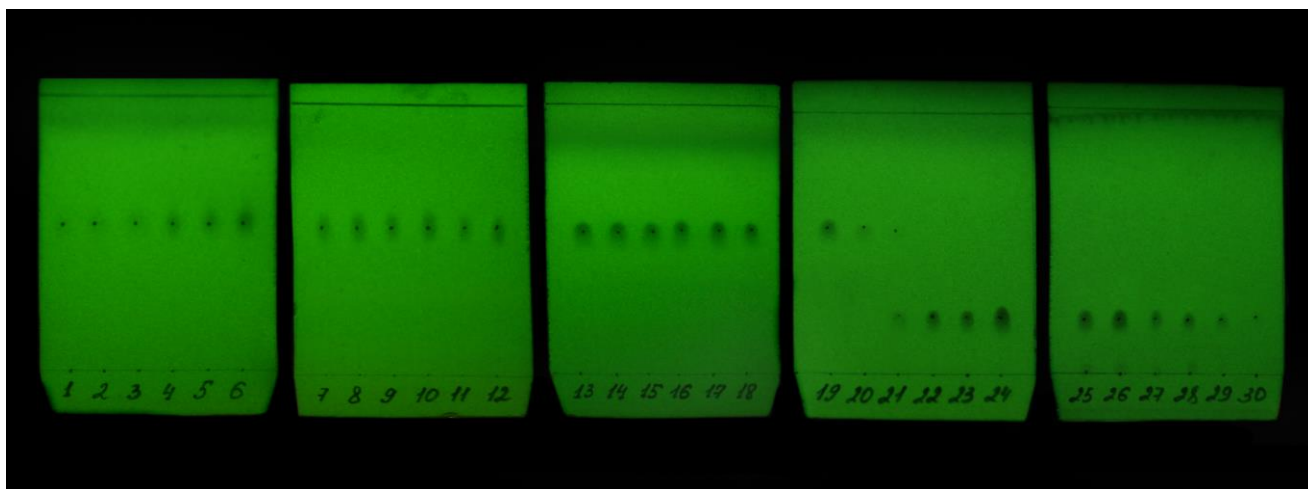

**Table S1.** Crystallographic data for **3a**, **4e** and **7c**

|                                                                              | <b>3a</b>                                                       | <b>4e</b>                                                       | <b>7c</b>                                                                    |
|------------------------------------------------------------------------------|-----------------------------------------------------------------|-----------------------------------------------------------------|------------------------------------------------------------------------------|
| CCDC                                                                         | 2215817                                                         | 2215818                                                         | 2215819                                                                      |
| Empirical formula                                                            | C <sub>20</sub> H <sub>23</sub> N <sub>7</sub> O <sub>3</sub> S | C <sub>27</sub> H <sub>39</sub> N <sub>7</sub> O <sub>5</sub> S | C <sub>20</sub> H <sub>23</sub> N <sub>7</sub> O <sub>2</sub> S <sub>2</sub> |
| Formula weight                                                               | 441.51                                                          | 573.71                                                          | 457.57                                                                       |
| T (K)                                                                        | 120                                                             | 295                                                             | 120                                                                          |
| Crystal system                                                               | Monoclinic                                                      | Orthorhombic                                                    | Triclinic                                                                    |
| Space group                                                                  | P2 <sub>1</sub> /c                                              | P2 <sub>1</sub> 2 <sub>1</sub> 2 <sub>1</sub>                   | P-1                                                                          |
| Z / Z'                                                                       | 4 / 1                                                           | 4 / 1                                                           | 2 / 1                                                                        |
| <i>a</i> , Å                                                                 | 10.4431(7)                                                      | 9.5788(2)                                                       | 8.8678(4)                                                                    |
| <i>b</i> , Å                                                                 | 15.6683(11)                                                     | 16.7852(3)                                                      | 9.6639(5)                                                                    |
| <i>c</i> , Å                                                                 | 13.1324(9)                                                      | 18.1337(3)                                                      | 13.3198(5)                                                                   |
| $\alpha$ , °                                                                 | 90                                                              | 90                                                              | 87.1340(10)                                                                  |
| $\beta$ , °                                                                  | 109.1969(14)                                                    | 90                                                              | 70.557(2)                                                                    |
| $\gamma$ , °                                                                 | 90                                                              | 90                                                              | 80.6250(10)                                                                  |
| <i>V</i> , Å <sup>3</sup>                                                    | 2029.3(2)                                                       | 2915.57(9)                                                      | 1061.99(8)                                                                   |
| <i>d</i> <sub>calc</sub> (g cm <sup>-3</sup> )                               | 1.445                                                           | 1.307                                                           | 1.431                                                                        |
| $\mu$ , cm <sup>-1</sup>                                                     | 1.99                                                            | 1.6                                                             | 2.84                                                                         |
| F(000)                                                                       | 928                                                             | 1224                                                            | 480                                                                          |
| 2 $\theta$ <sub>max</sub> , °                                                | 61.4                                                            | 61.1                                                            | 61.2                                                                         |
| Refls collected                                                              | 27883                                                           | 44223                                                           | 14488                                                                        |
| Independent refls [Rint]                                                     | 6271 [0.0431]                                                   | 8926 [0.0869]                                                   | 6495 [0.0164]                                                                |
| Observed refls [ <i>I</i> > 2 $\sigma$ ( <i>I</i> )]                         | 5148                                                            | 4752                                                            | 5733                                                                         |
| Parameters                                                                   | 288                                                             | 408                                                             | 288                                                                          |
| <i>R</i> 1                                                                   | 0.0399                                                          | 0.0562                                                          | 0.0323                                                                       |
| w <i>R</i> 2                                                                 | 0.1075                                                          | 0.1332                                                          | 0.0860                                                                       |
| GOF                                                                          | 1.035                                                           | 1.015                                                           | 1.022                                                                        |
| Residual density, $\Delta\rho_{\max}/\Delta\rho_{\min}$ (e Å <sup>-3</sup> ) | 0.525/-0.252                                                    | 0.402/-0.211                                                    | 0.466/-0.274                                                                 |

**Table S2.** Sum of CNN, CNC, NNH and CNH angles (°) for **3a**, **4e** and **7c**

|      | <b>3a</b> | <b>4e</b> | <b>7c</b> |
|------|-----------|-----------|-----------|
| N(1) | 351.06    | 354.39    | 359.4     |
| N(2) | 354.39    | 351.93    | 358.31    |
| N(3) | 330.04    | 327.83    | 340.06    |
| N(4) | 334.77    | 333.51    | 337.69    |

/KANI IA441

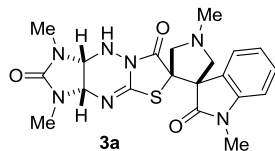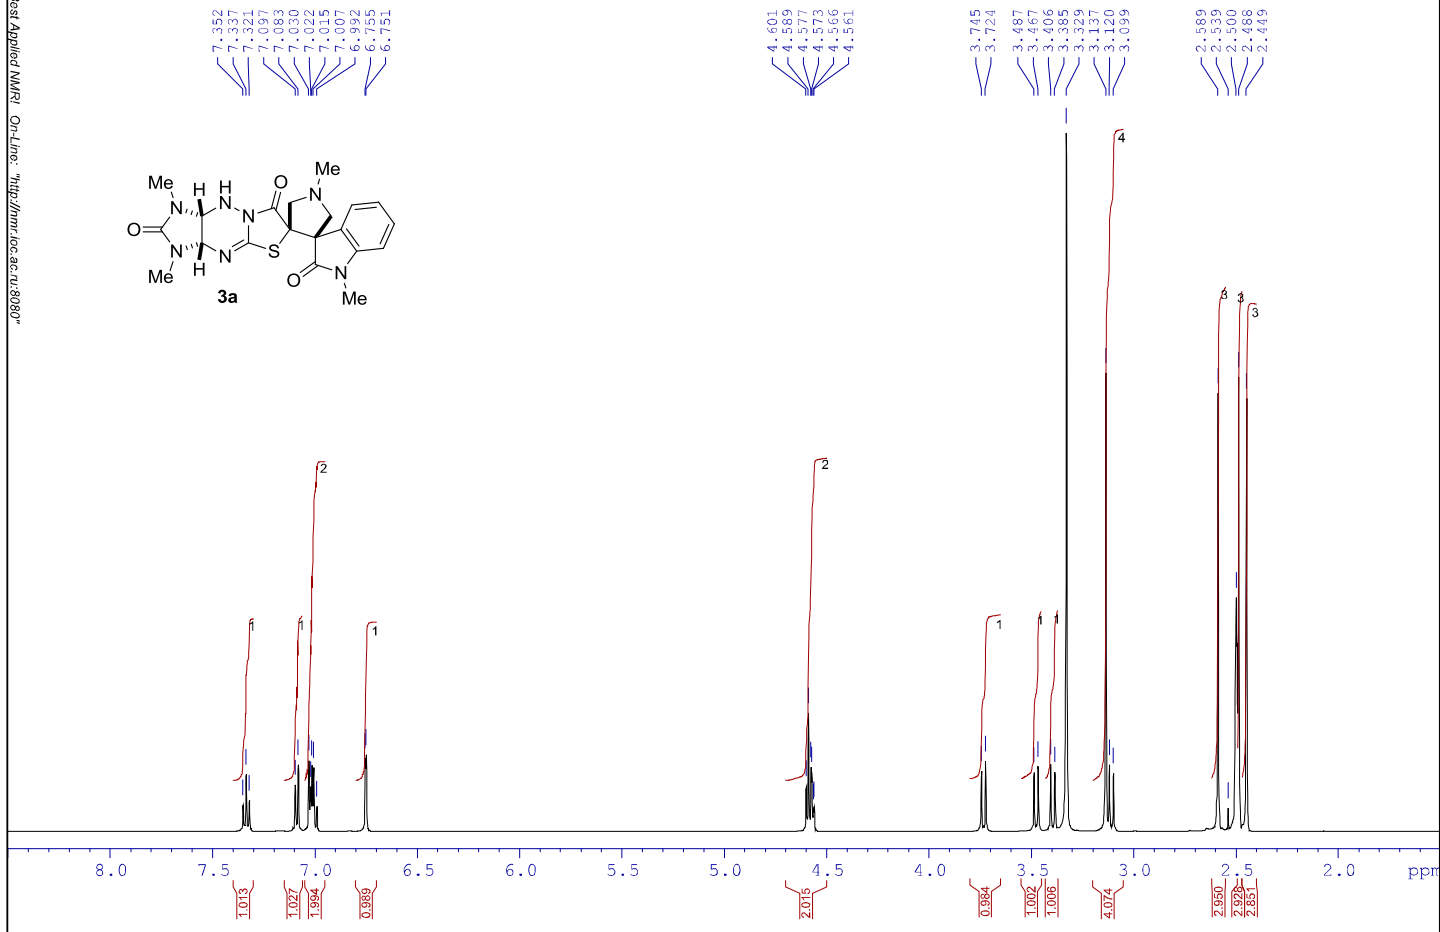

/KANI IA437.1

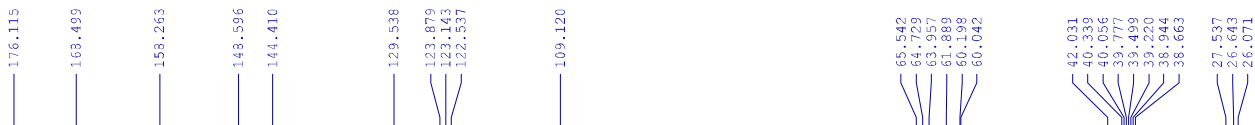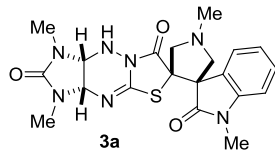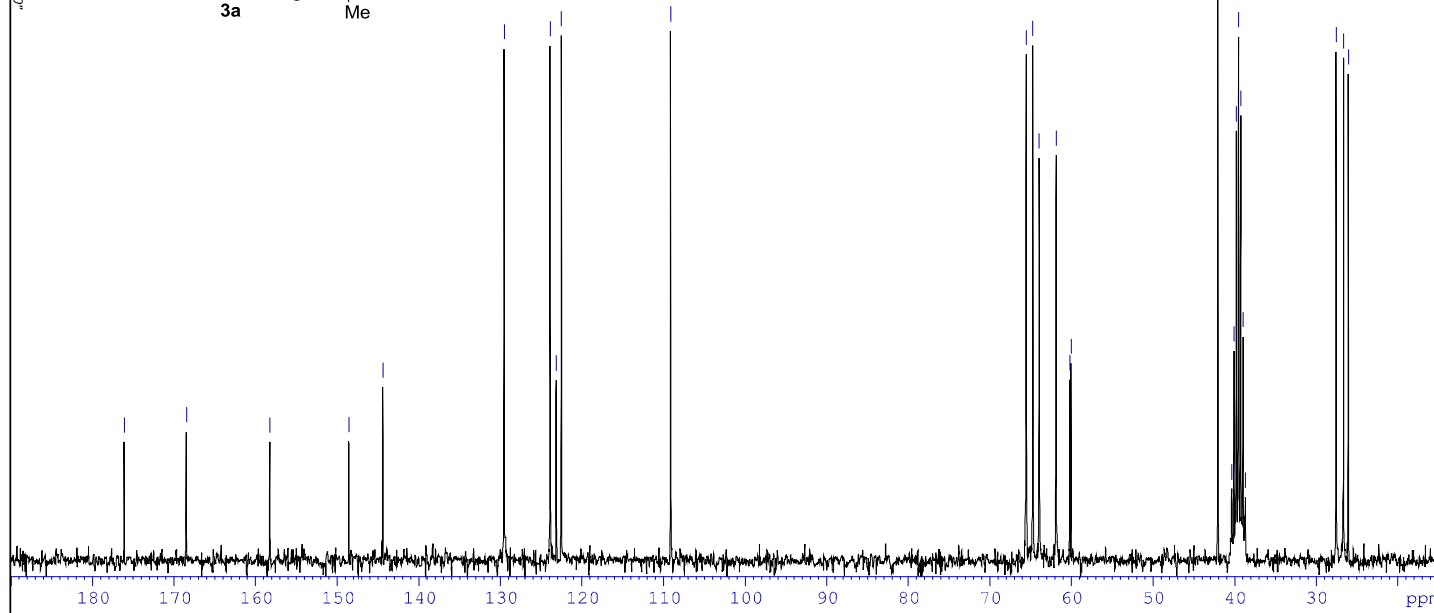

/KANI IA441  
NOESY

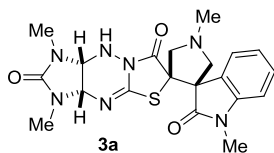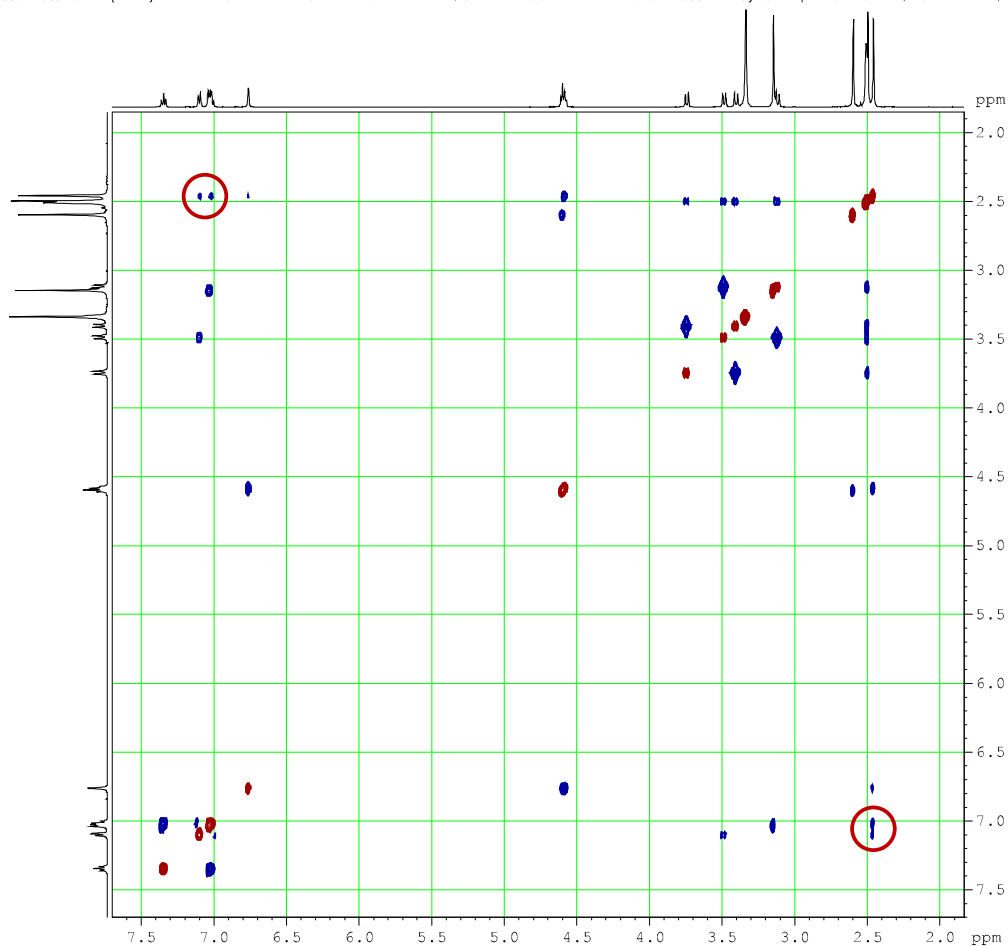

/KANI KN15.4

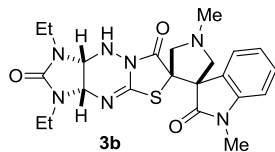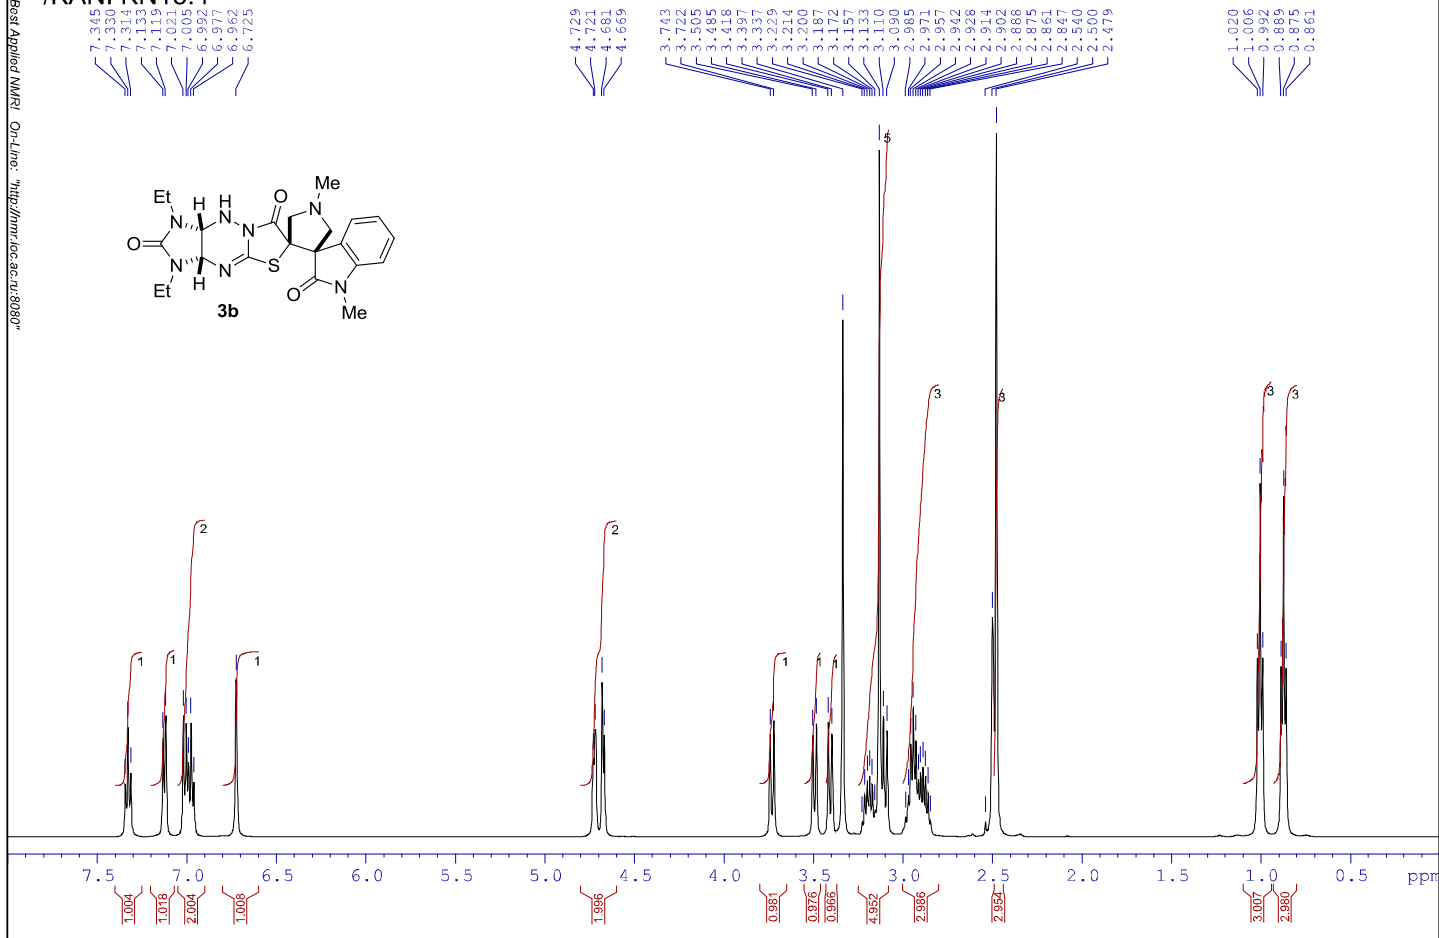

/KANI KN15.1

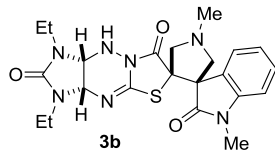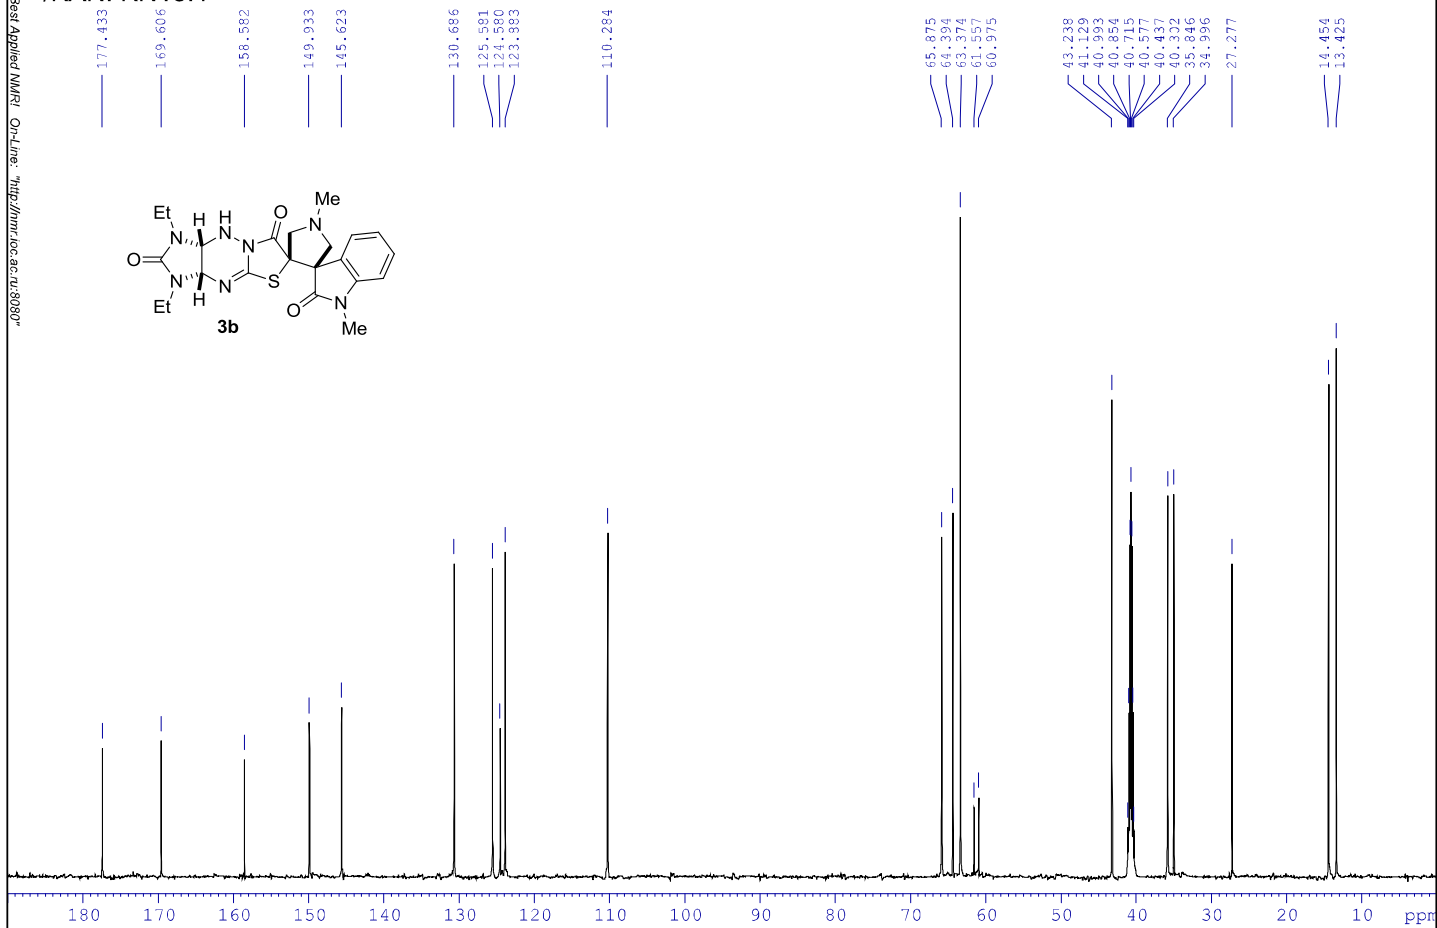



/KANI KN15.4  
NOESY

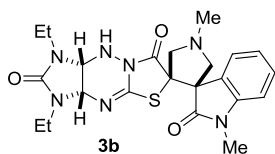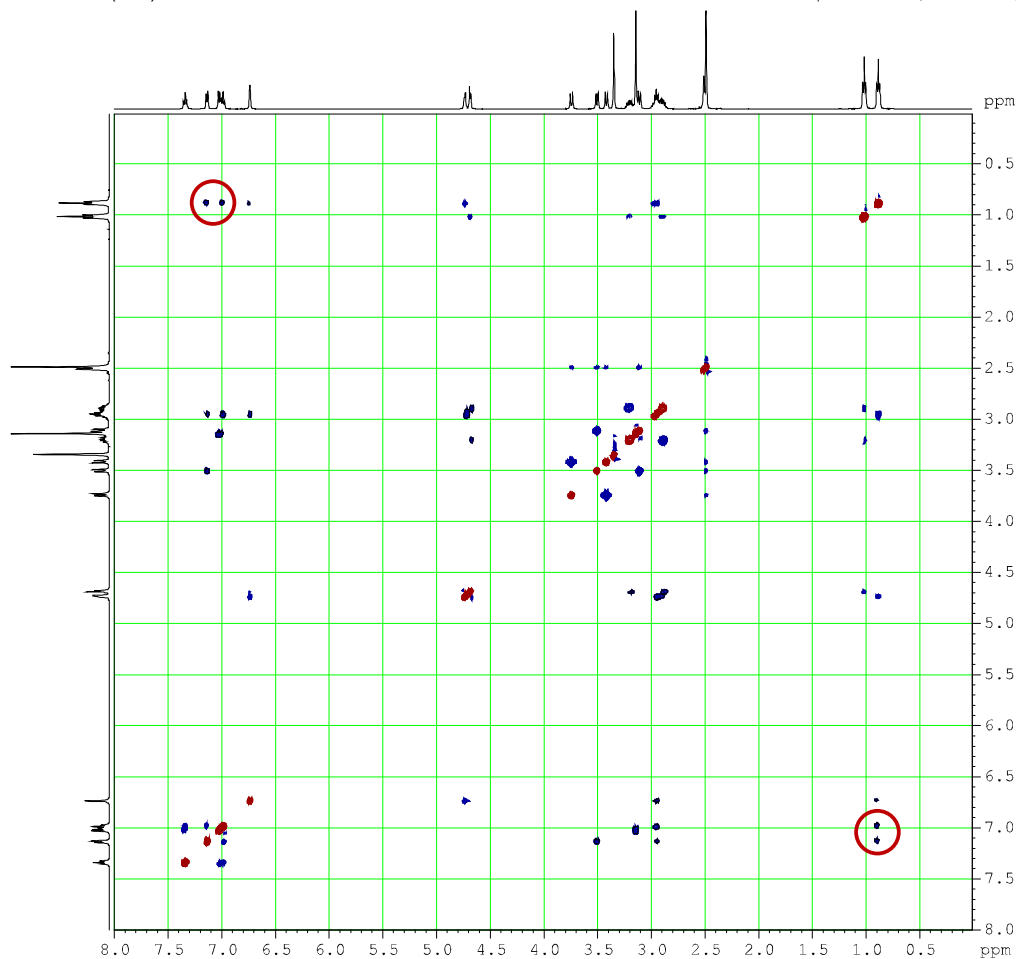

/KANI KN58.3

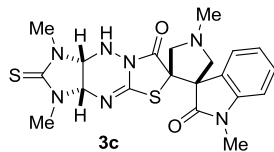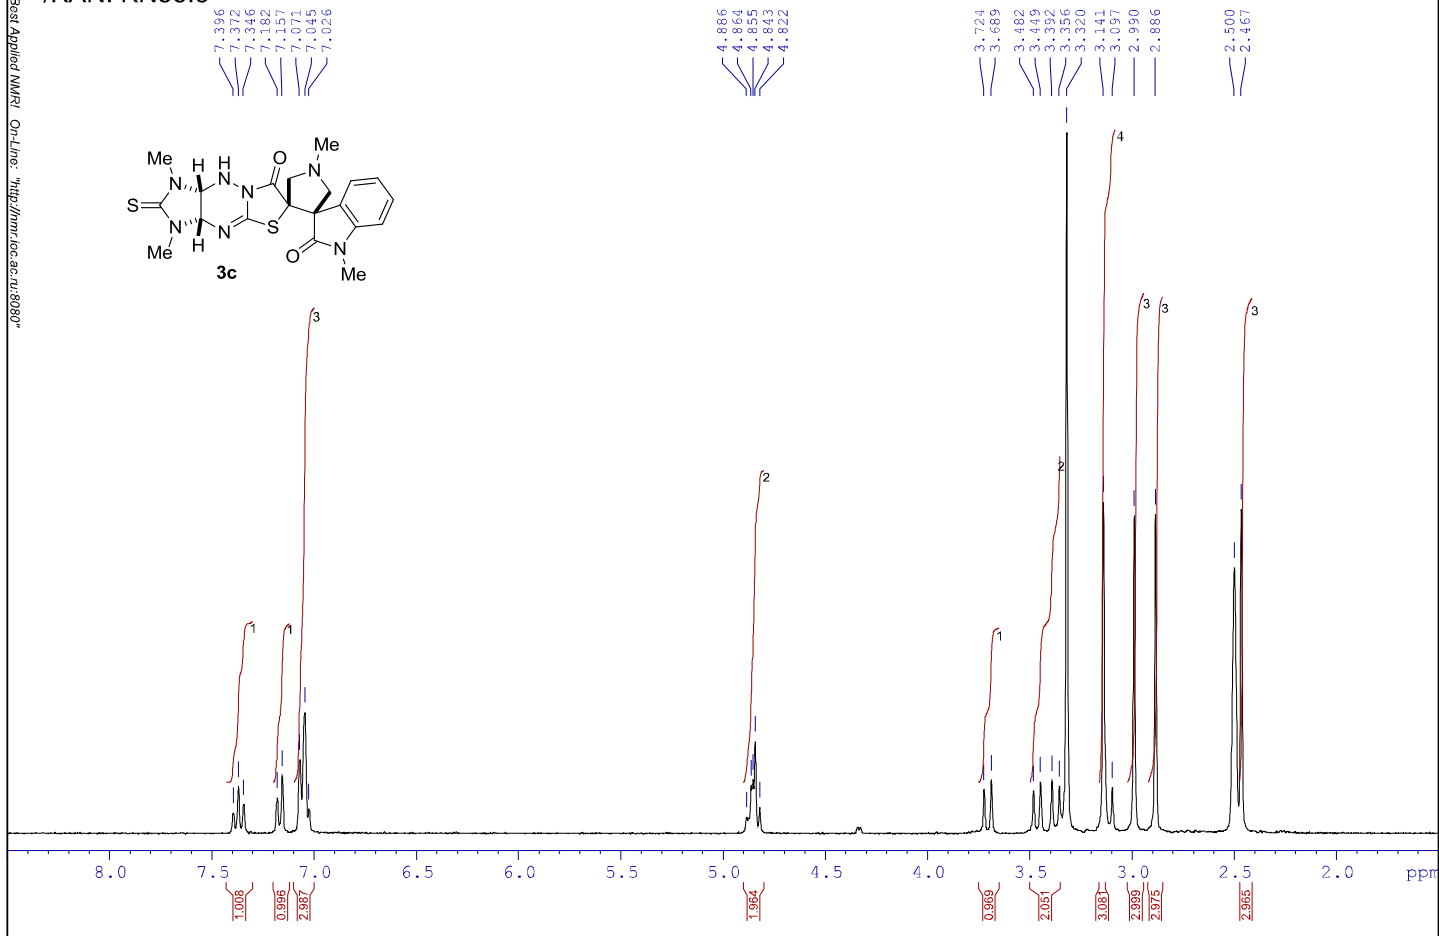

/KANI KN58.3

182.687

175.960

167.821

149.304

144.527

129.647

124.269

123.106

122.978

108.957

67.844

66.793

63.017

61.599

60.431

60.234

41.923

40.348

40.065

39.785

39.509

39.229

38.957

38.664

31.048

30.796

26.068

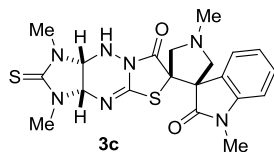

3c

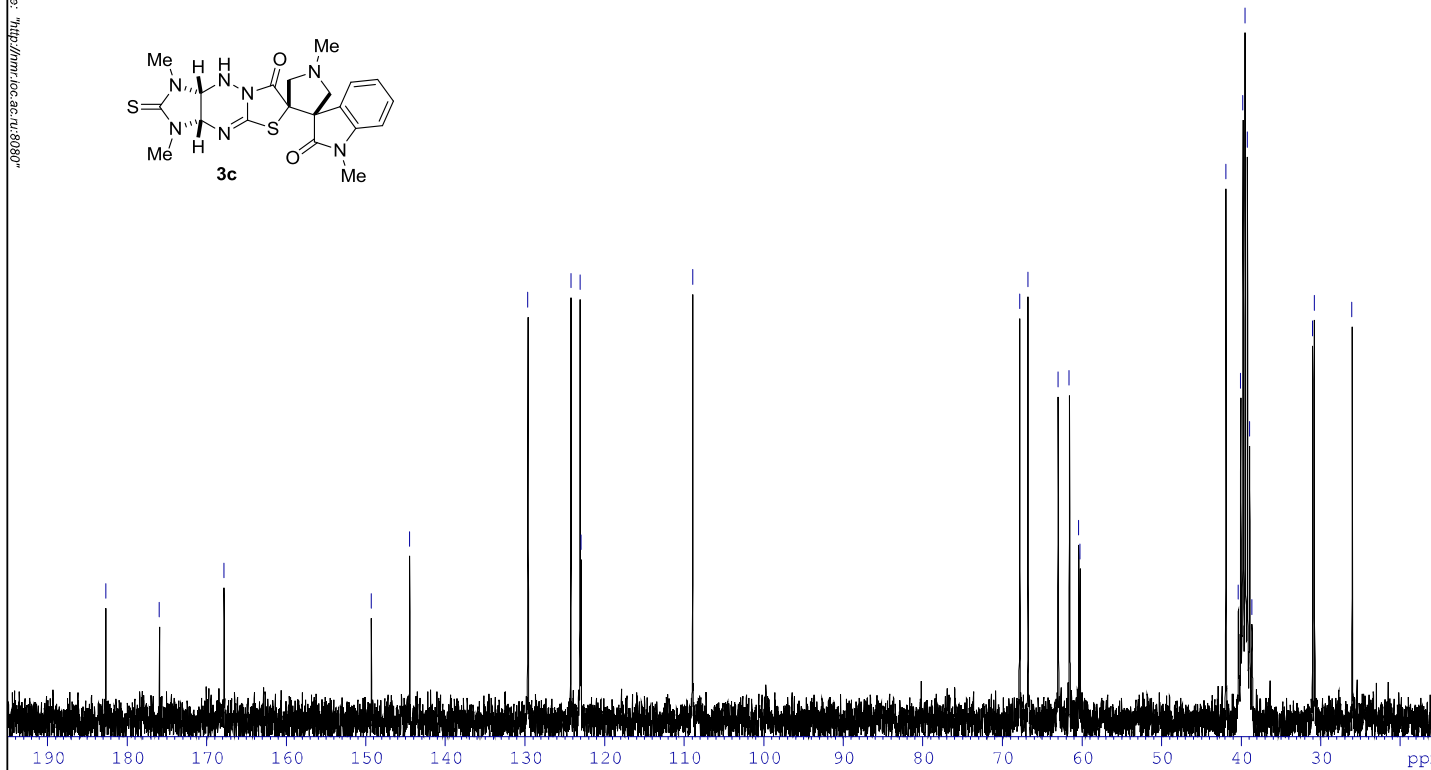

/KANI IA701.1

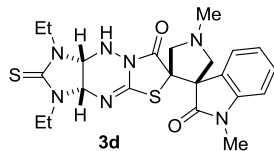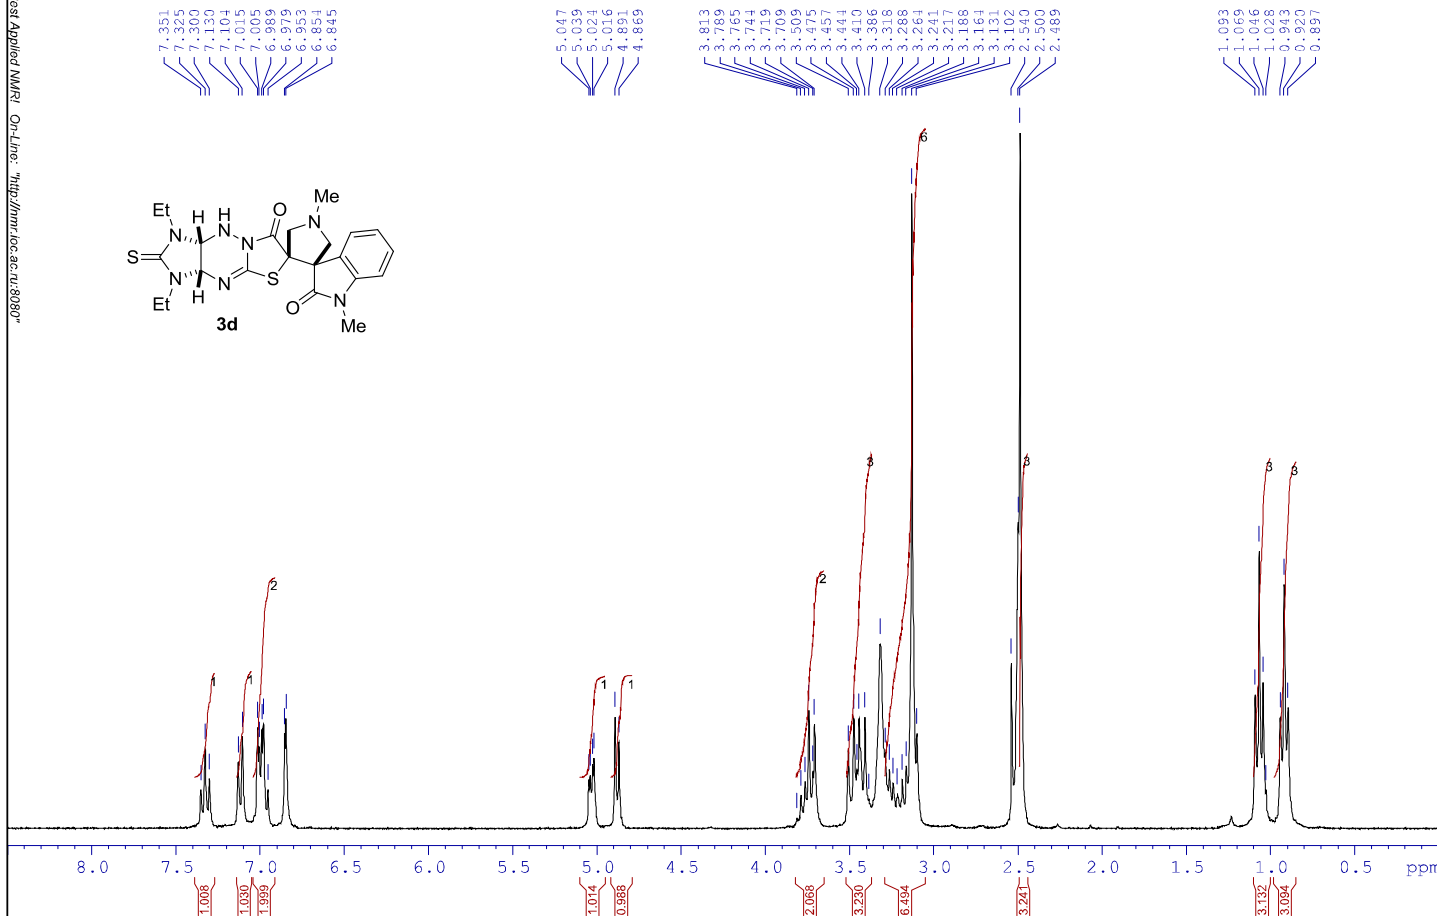

/KANI IA701.2

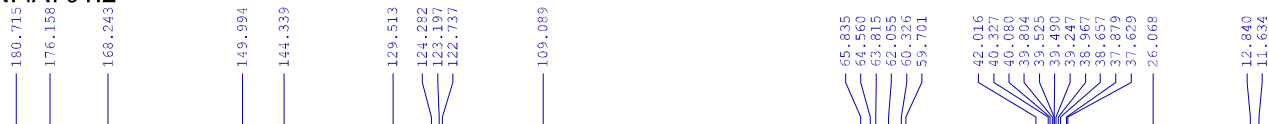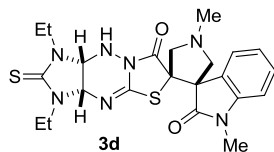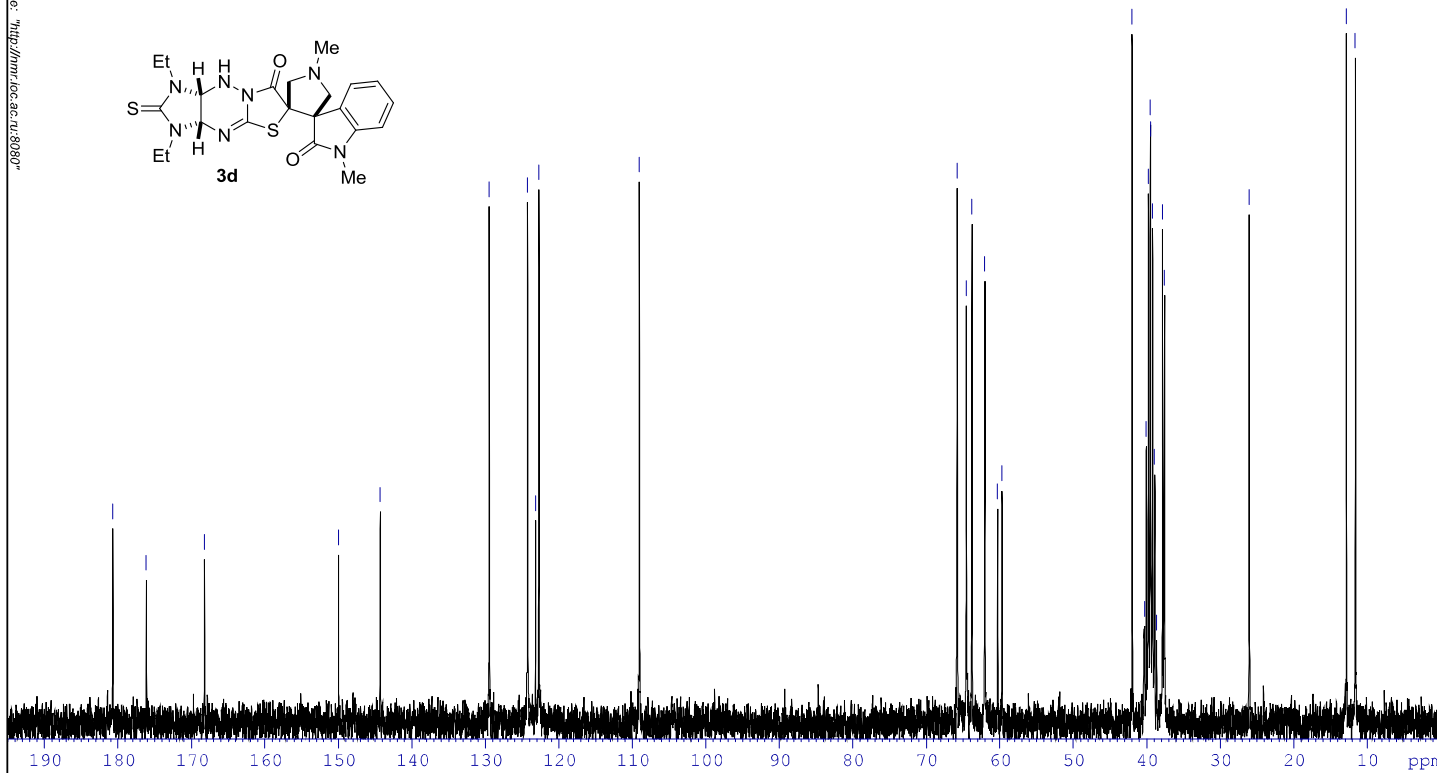

/KANI IA1584.2

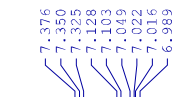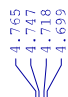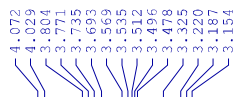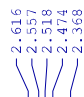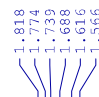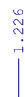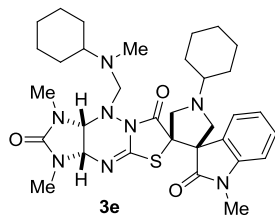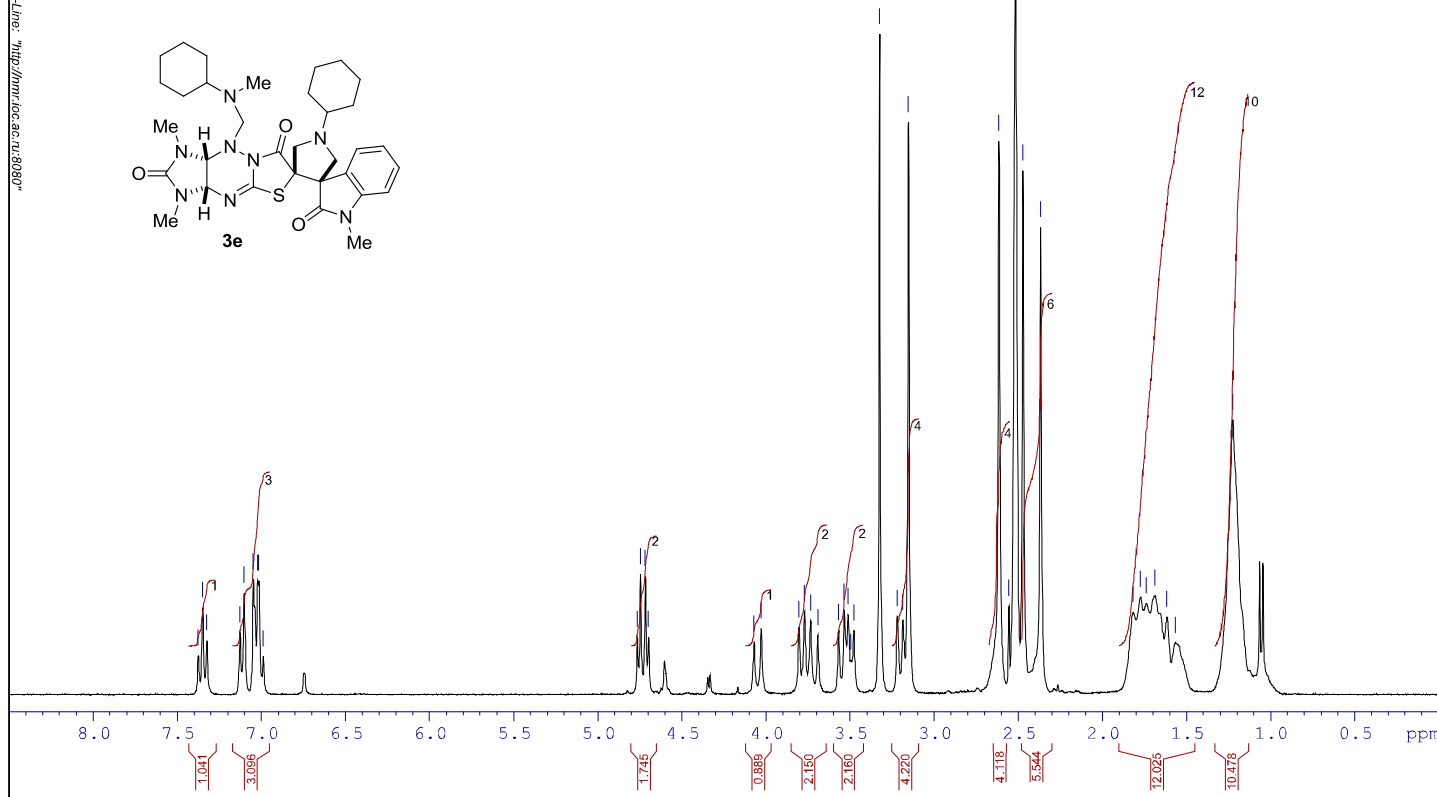

/KANI IA1584.2

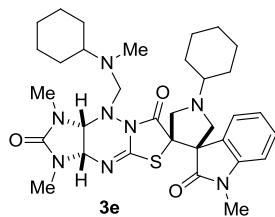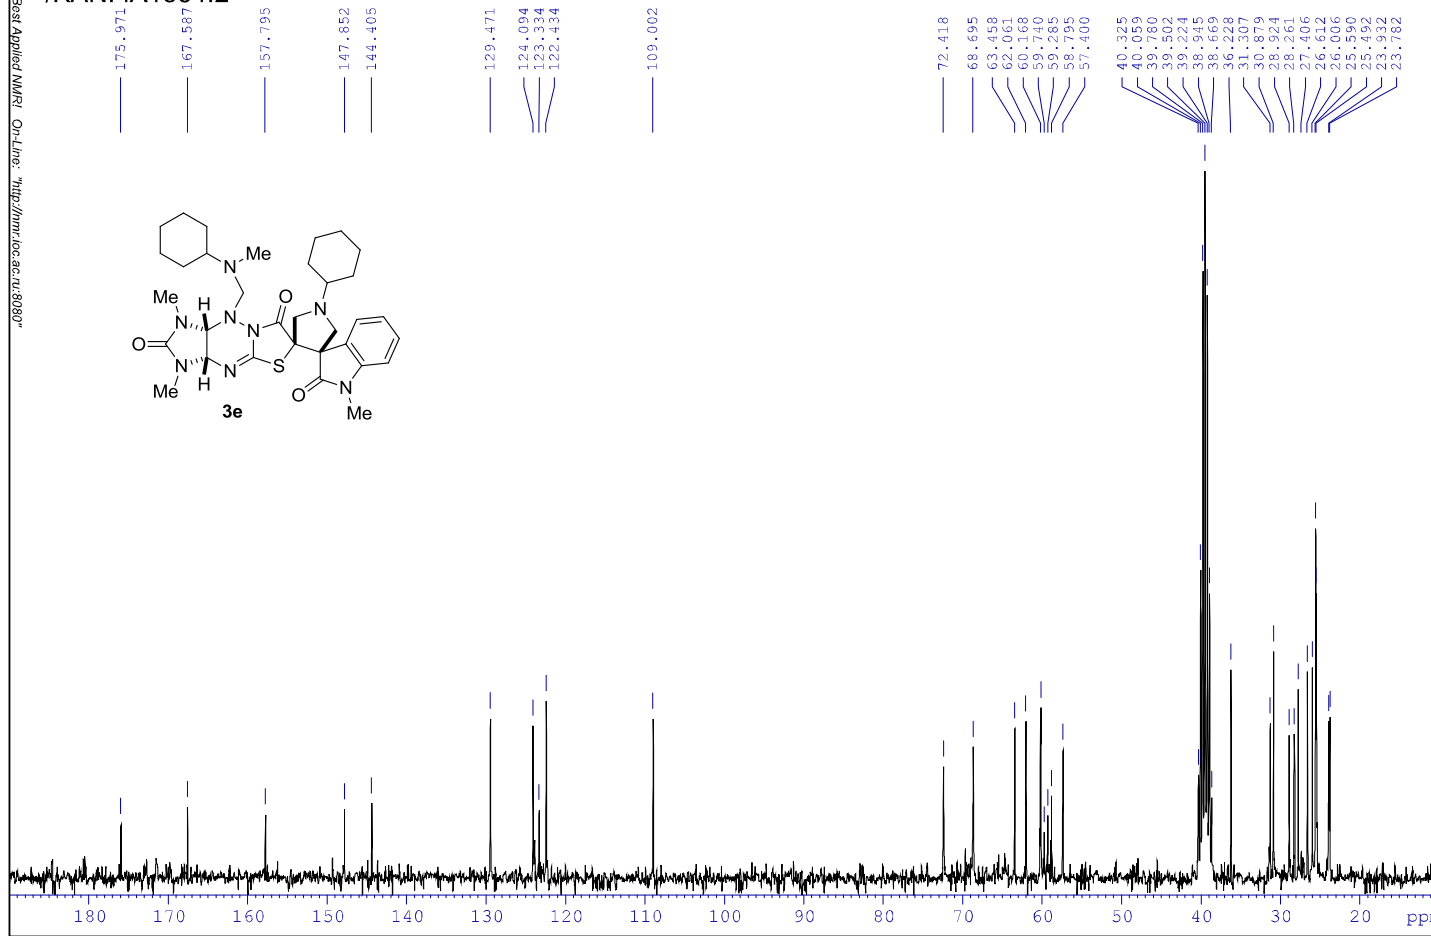

/KANI IA535.1

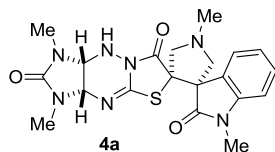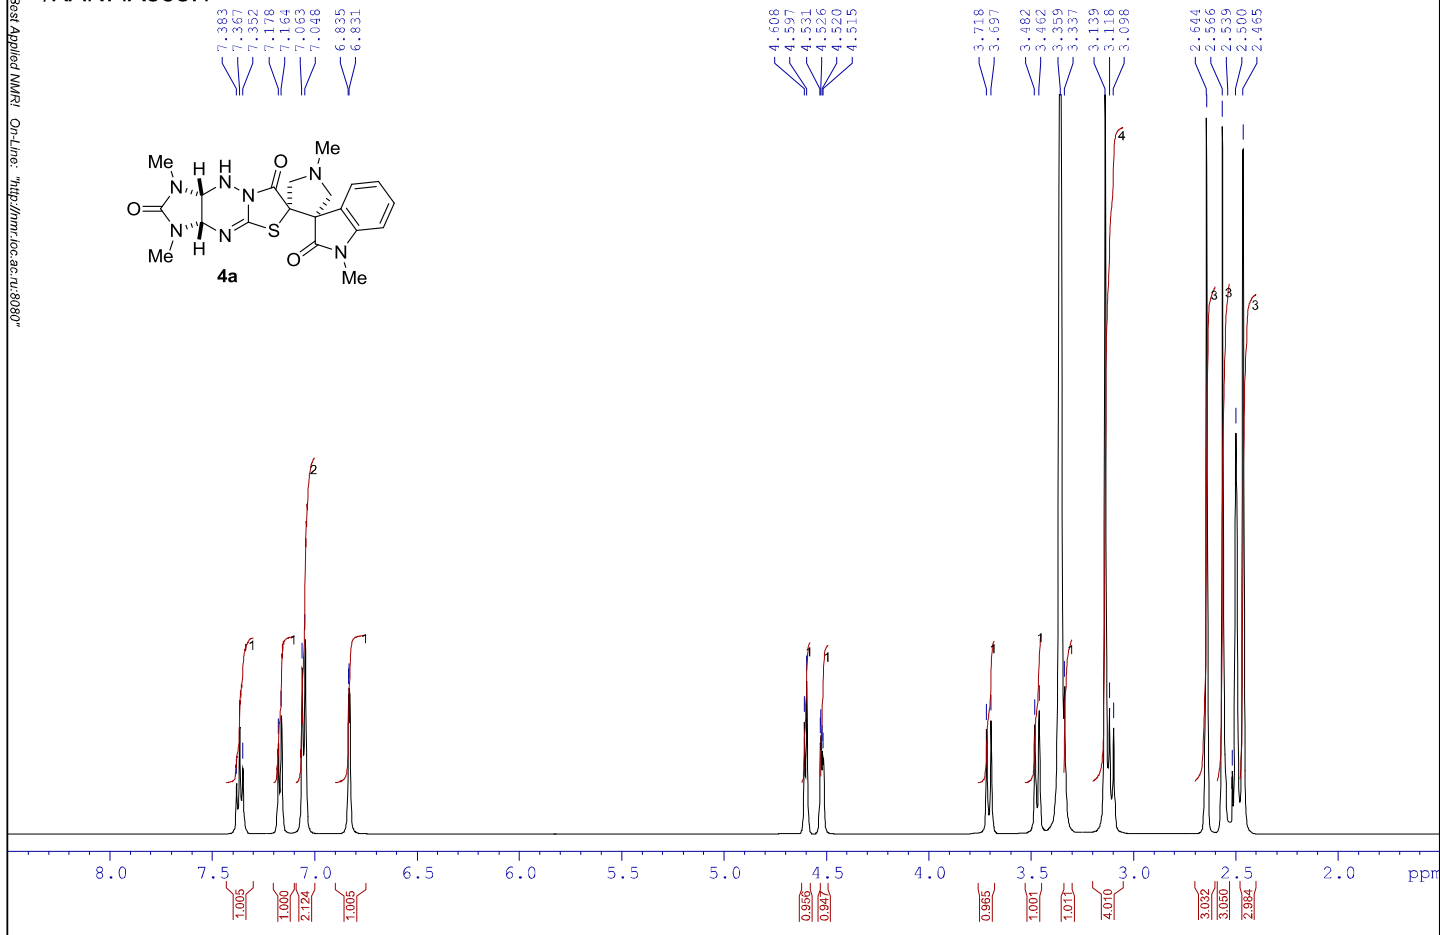



/KANI IA535.2

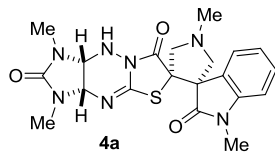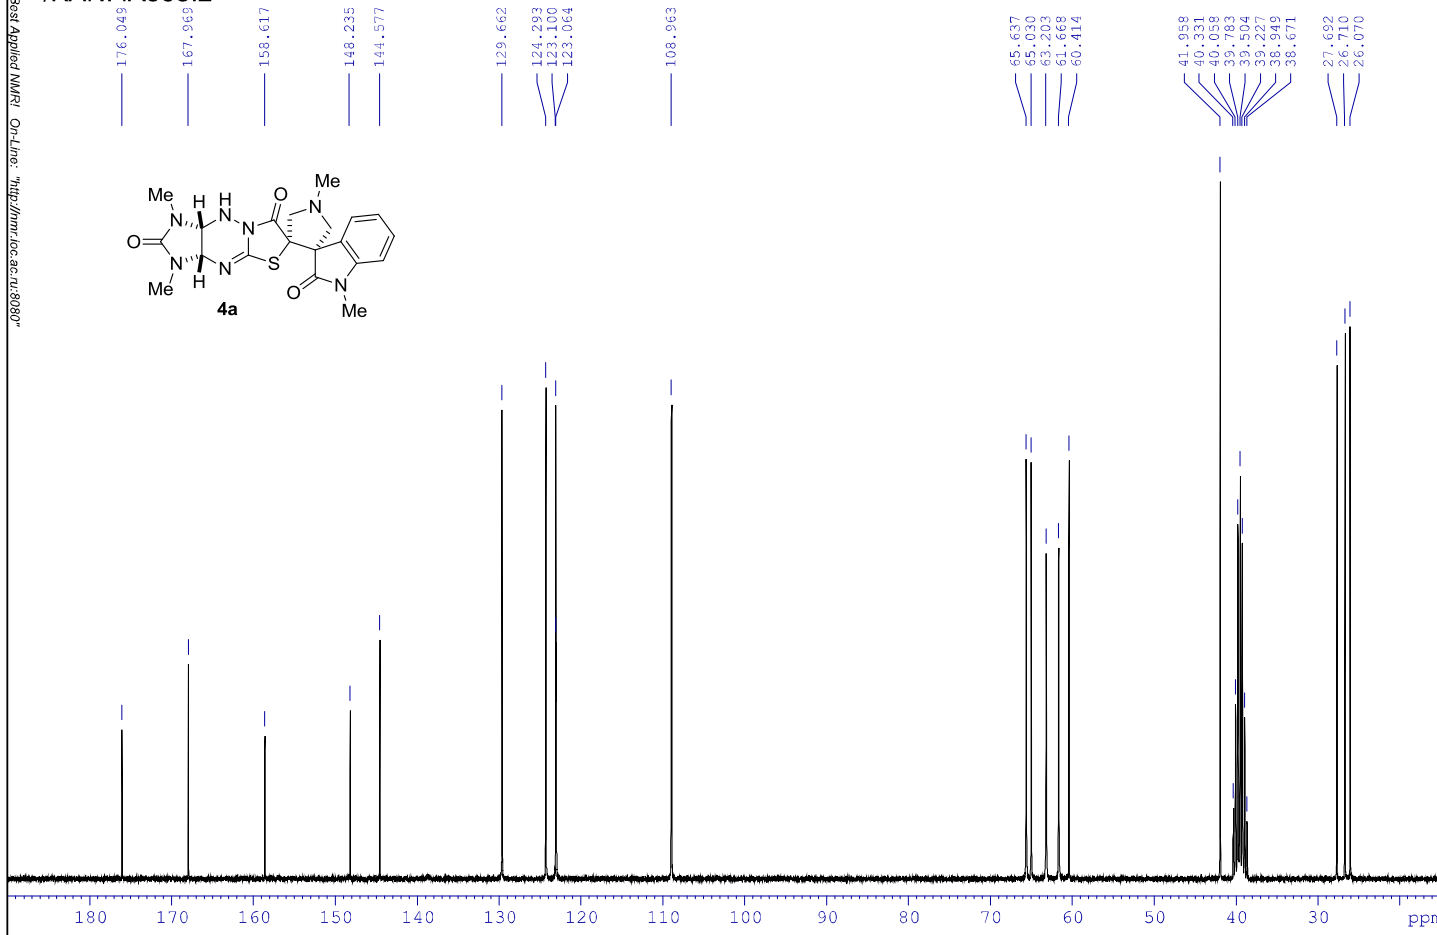

/KANI KN24.3

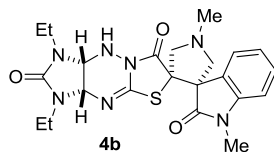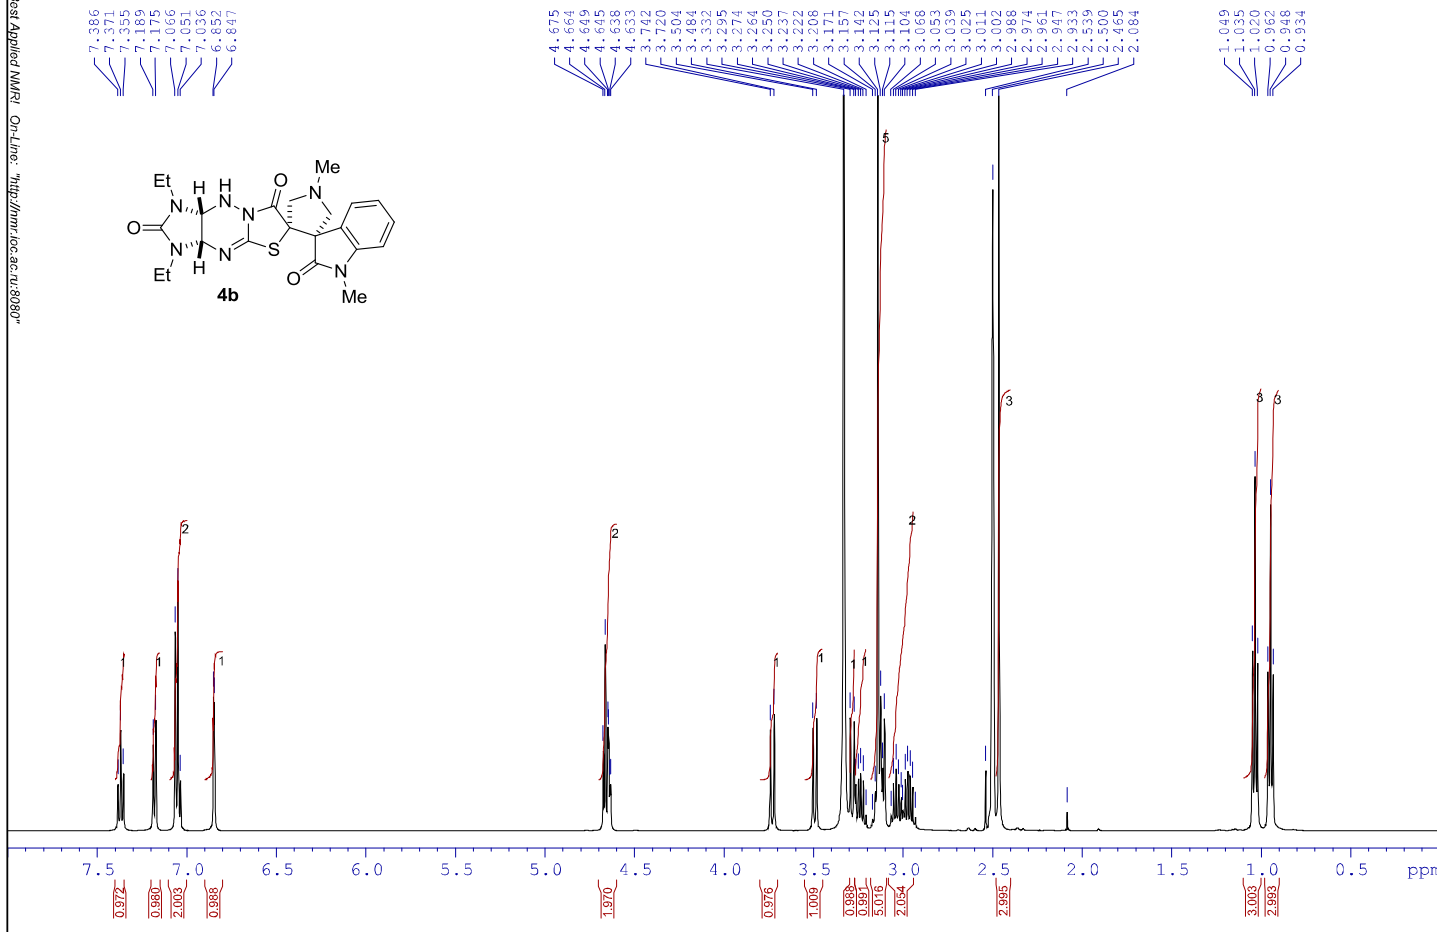

/KANI KN24.3

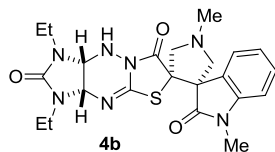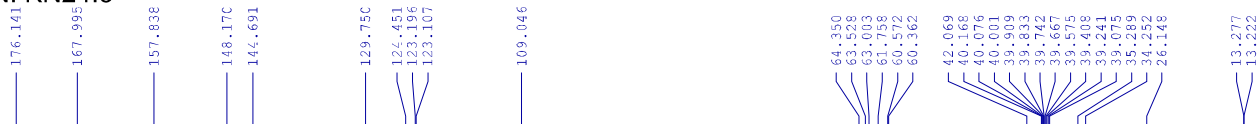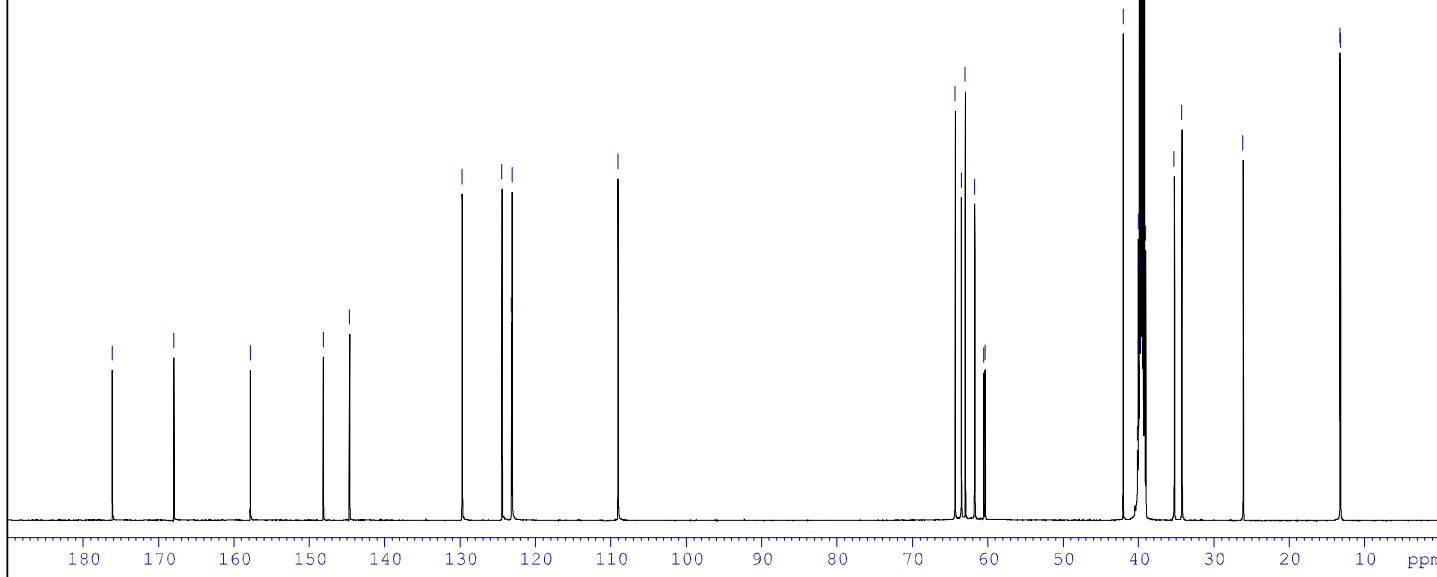

/KANI IA582.1

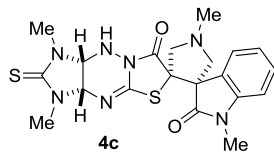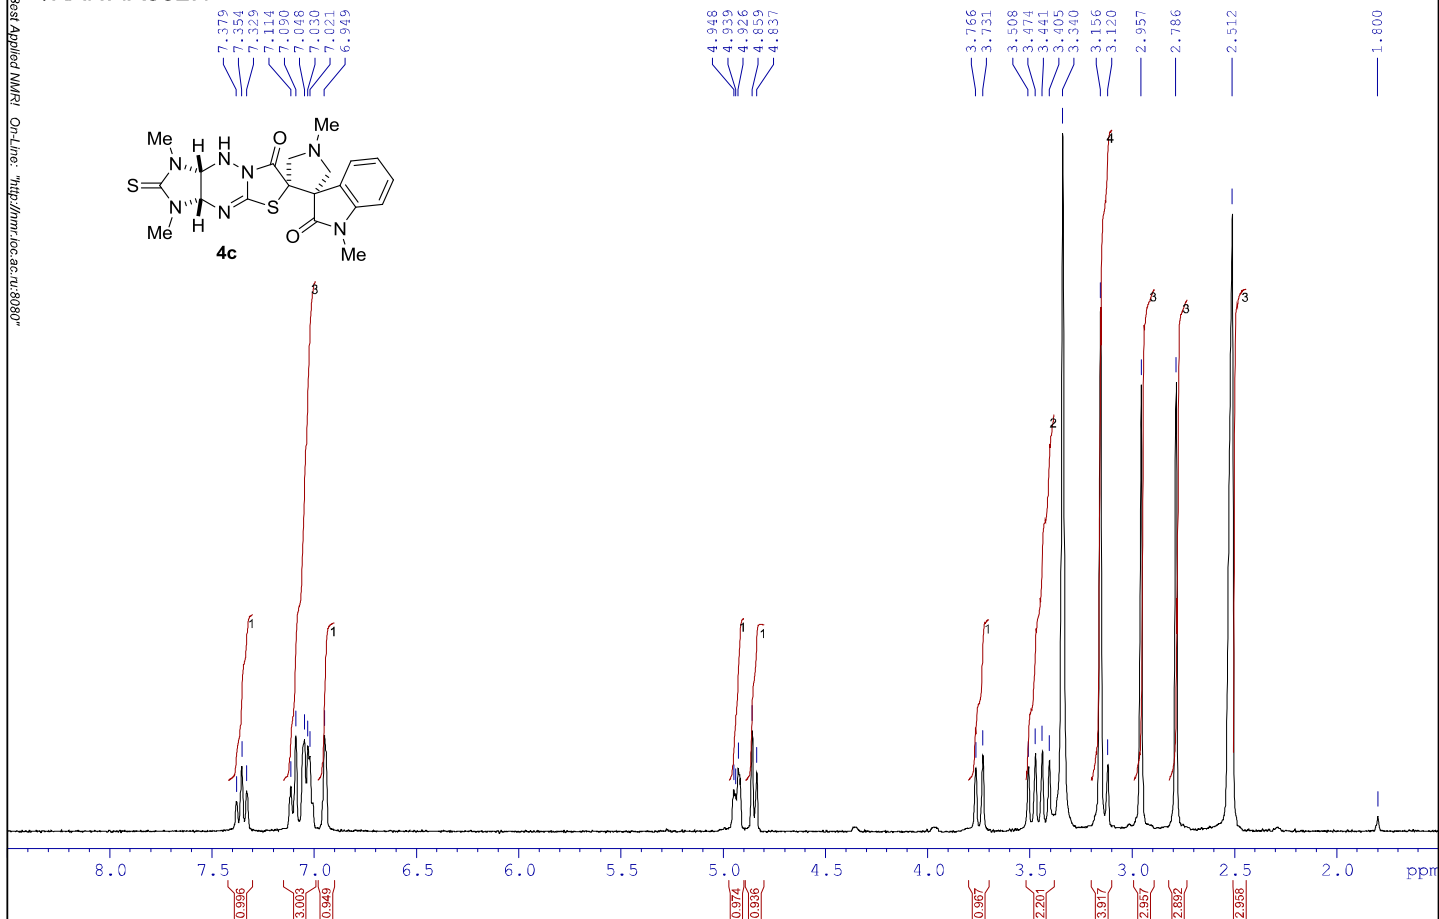

/KANI IA582.1

182.363

176.047

168.353

149.803

144.335

129.537

123.722

123.016

122.614

109.104

67.880

66.408

63.881

61.803

60.153

59.983

41.976

41.341

40.063

39.784

39.510

39.231

38.957

38.690

30.952

30.616

26.059

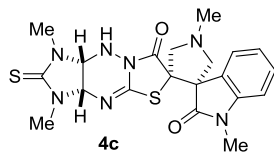

4c

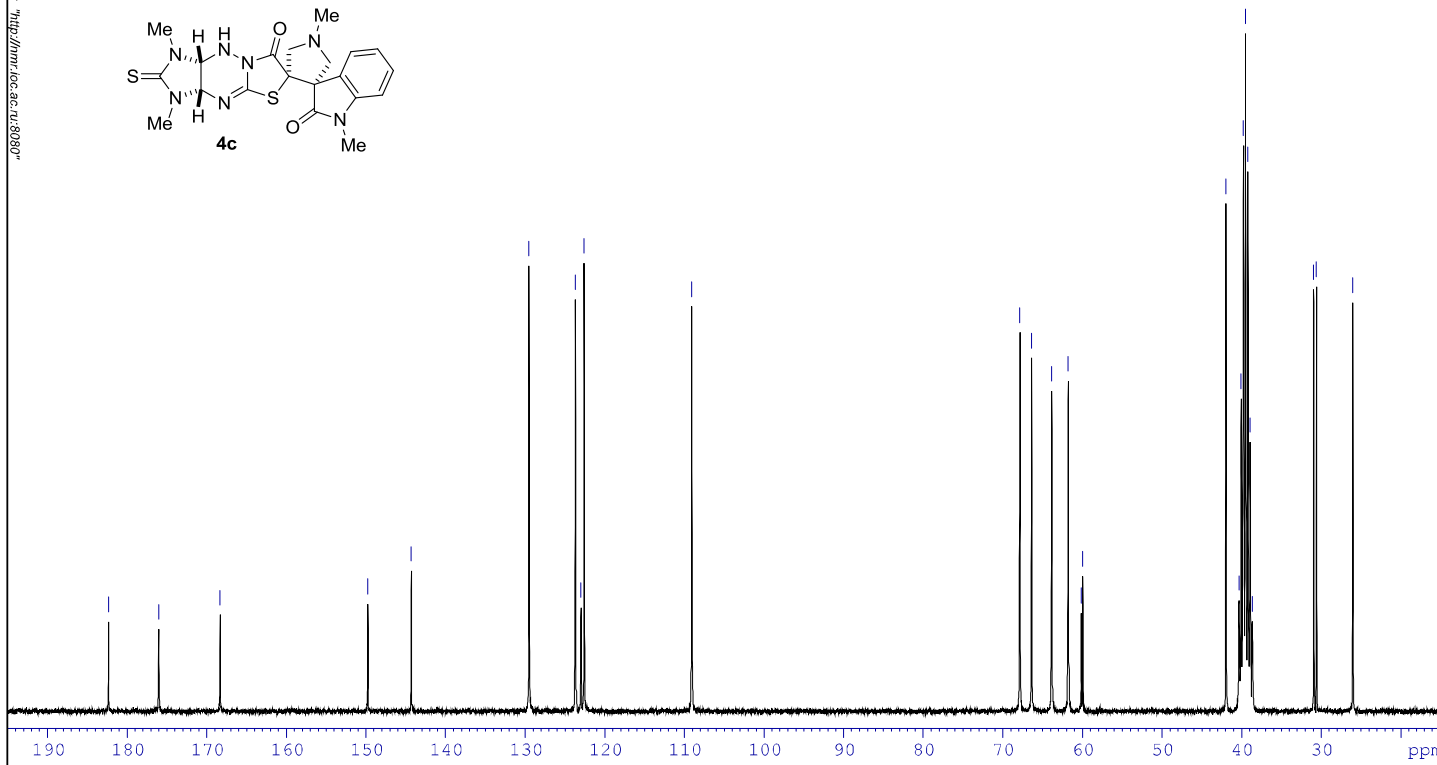

/KANI KN86.1

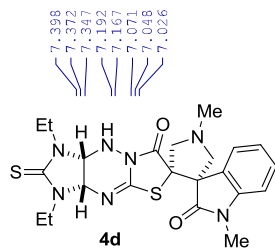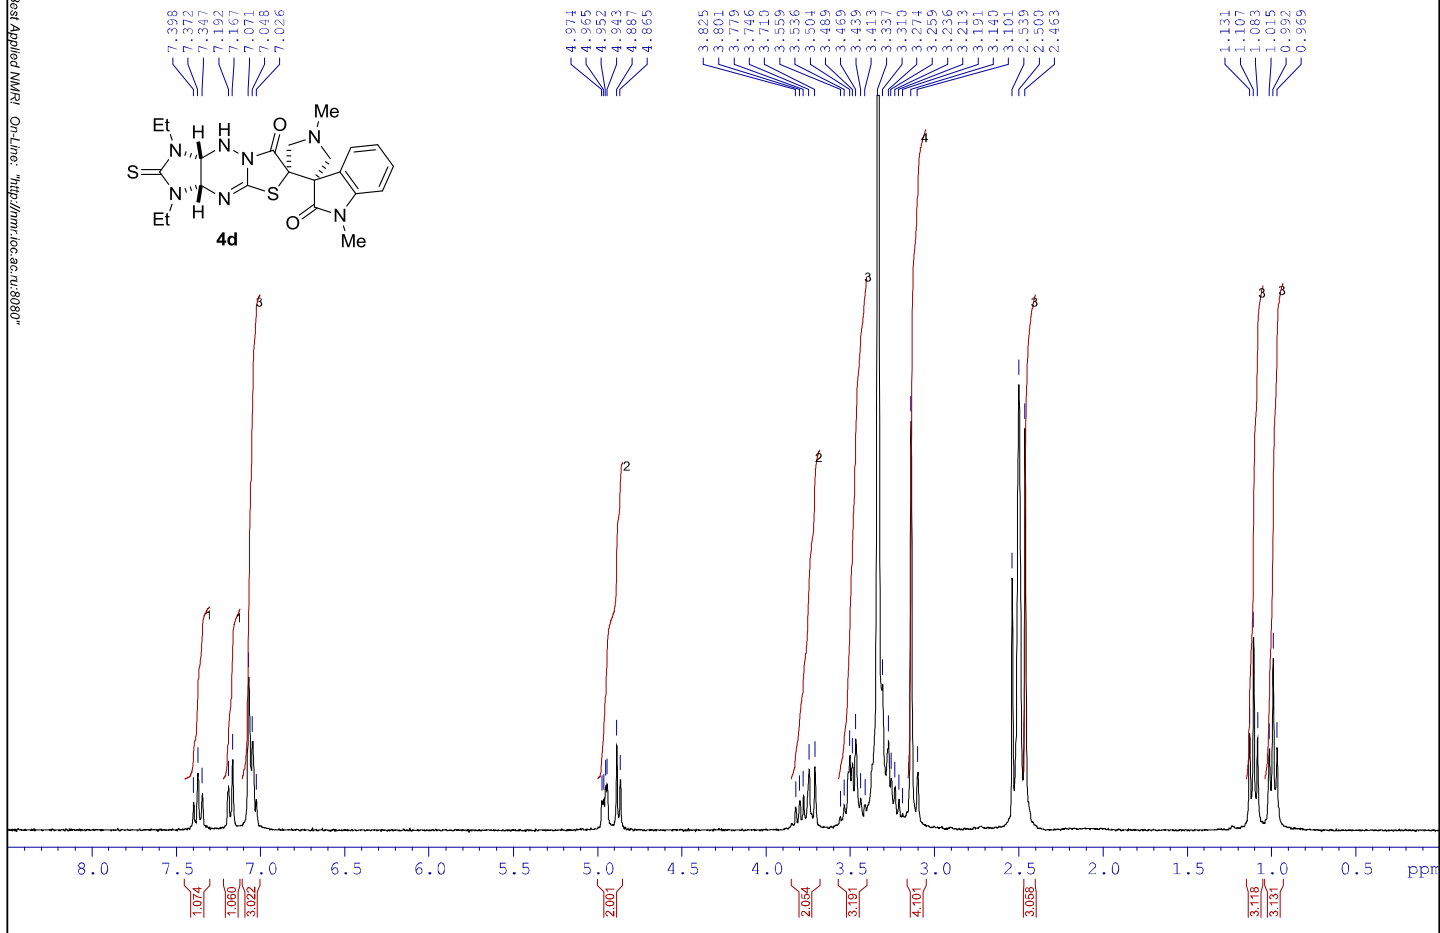

/KANI KN70.2

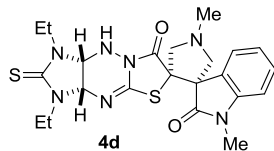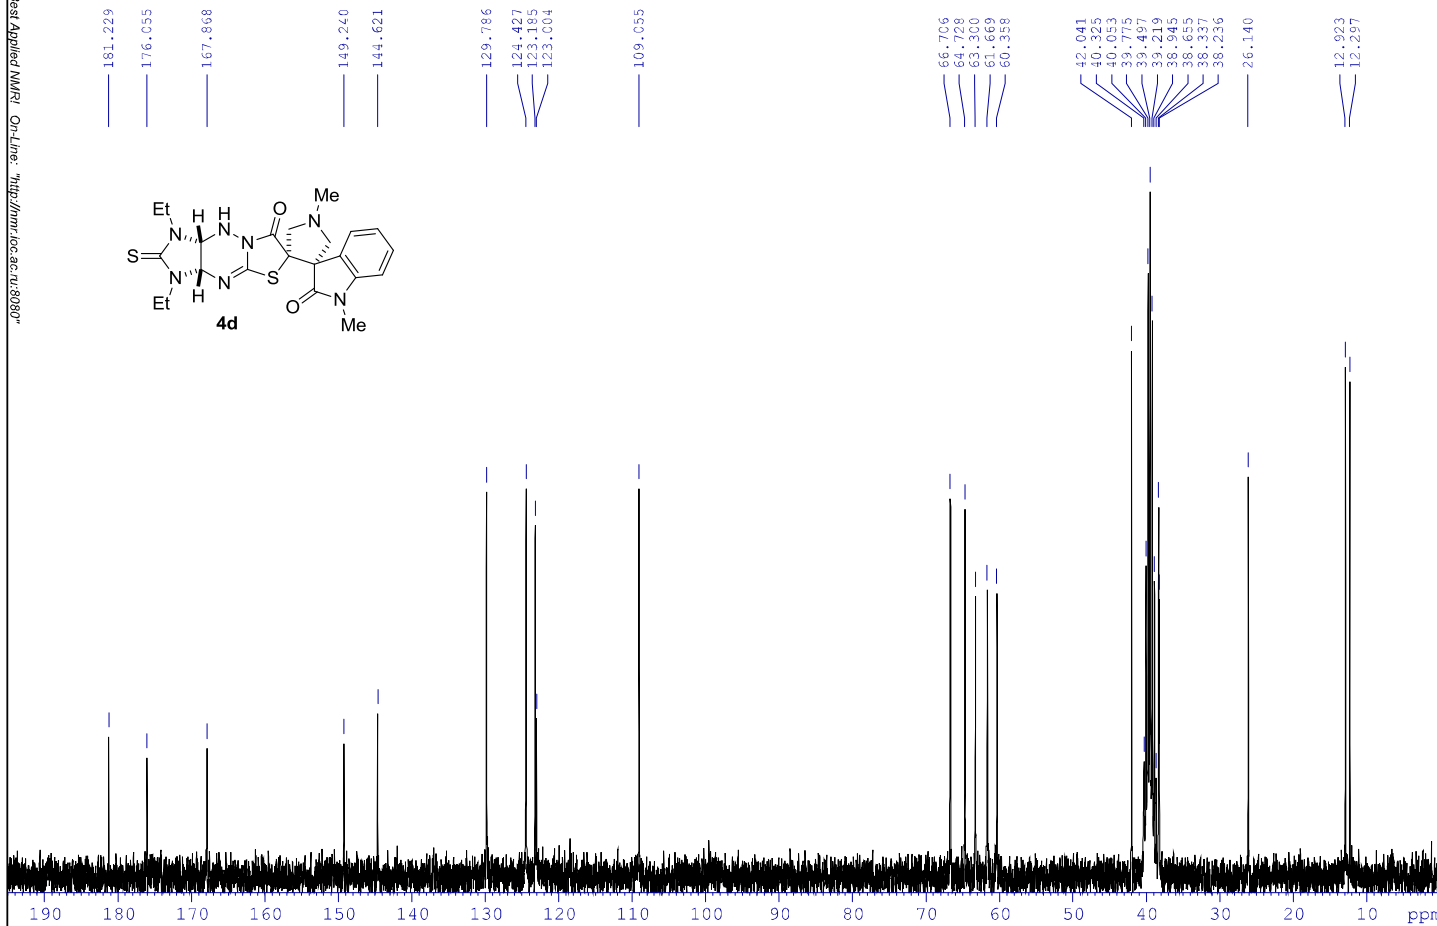

/KANI IA1309.5

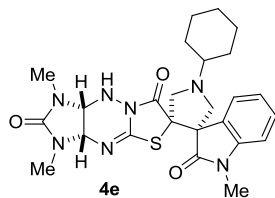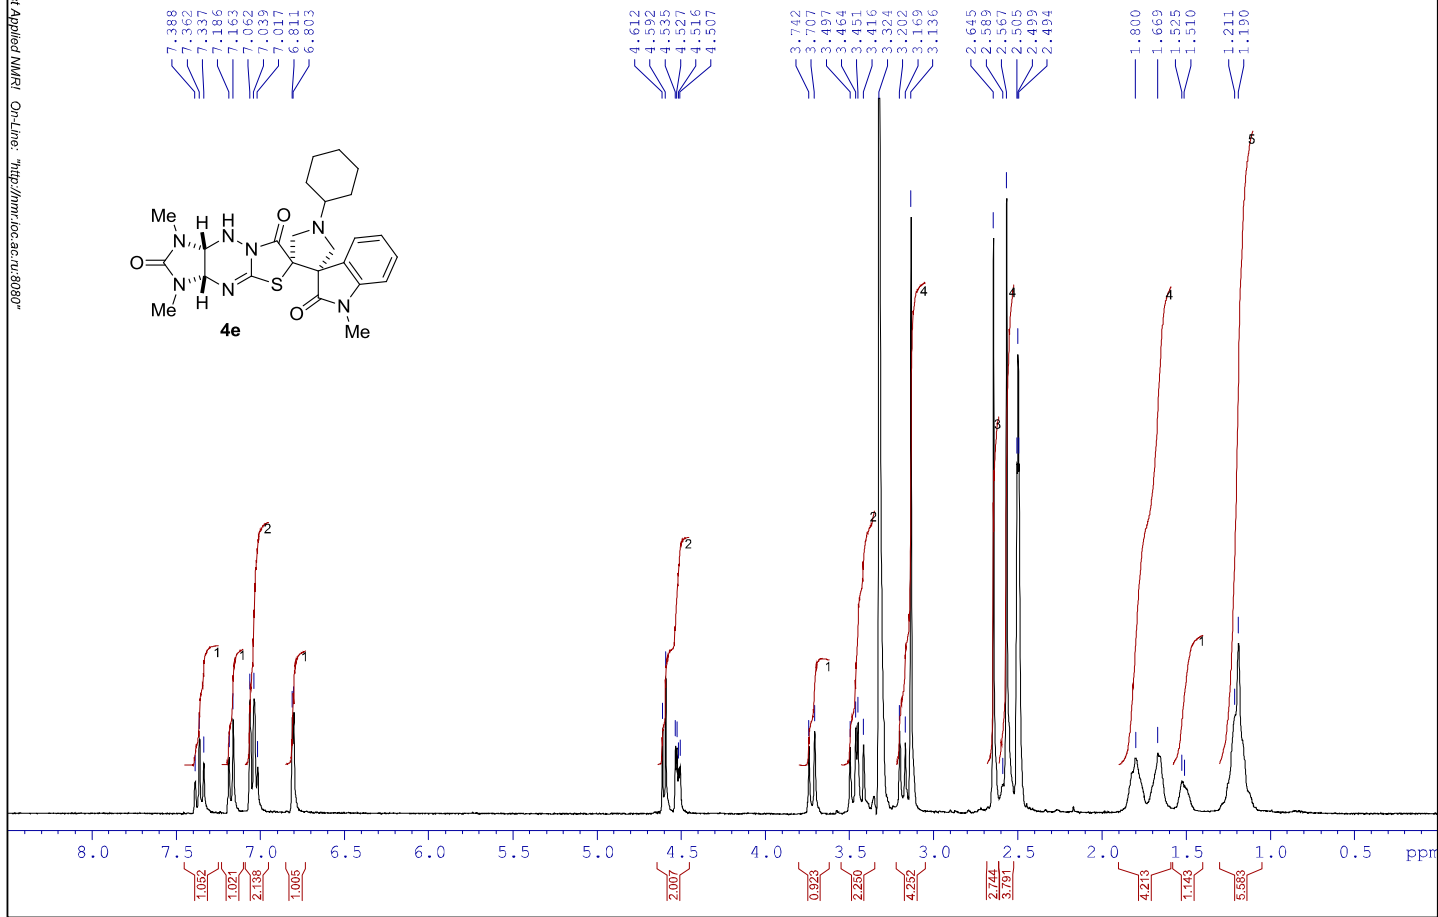



/KANI IA1309.4 DMSO-d6 13C 10mg 1024scans

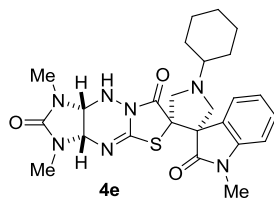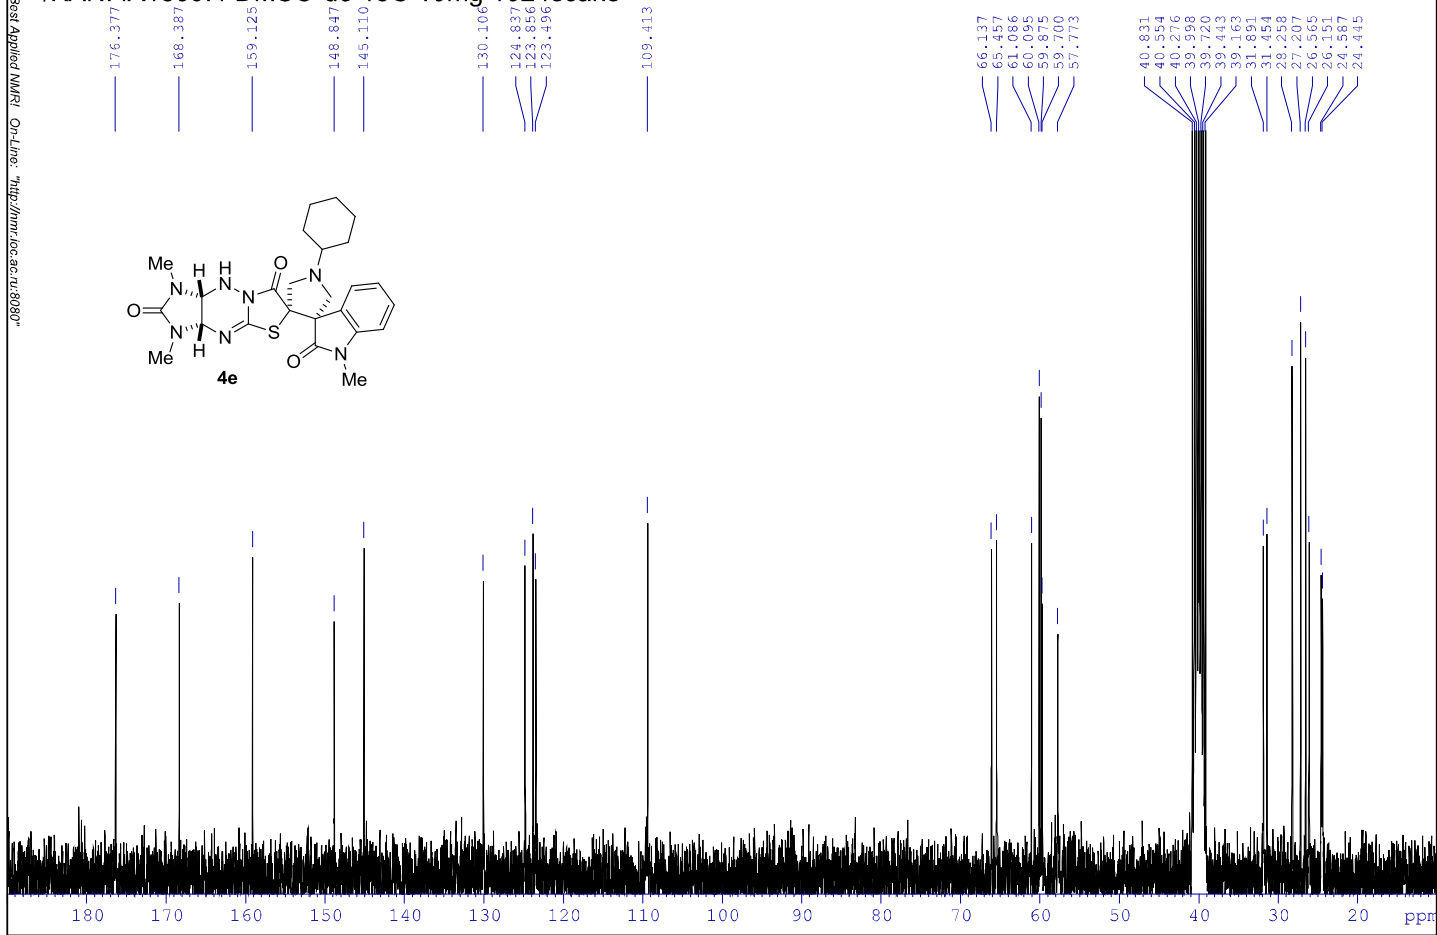

/KANI IA564.4

7.476  
7.472  
7.343  
7.327  
7.312  
7.203  
7.186  
7.103  
6.936  
6.926  
6.906

5.351  
5.350

4.547  
4.542  
4.536  
4.532  
4.397  
4.389

3.652  
3.641  
3.471  
3.452  
3.450  
3.441  
3.402  
3.370  
3.131  
3.105  
3.085  
2.900

2.500  
2.457  
2.456

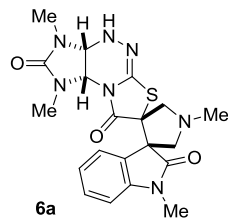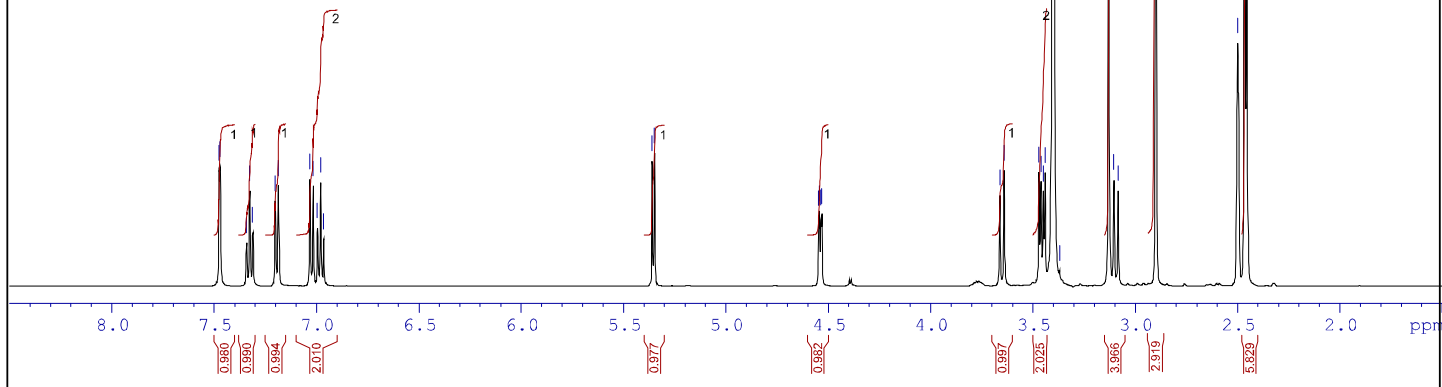

/KANI IA564.3

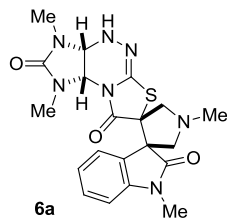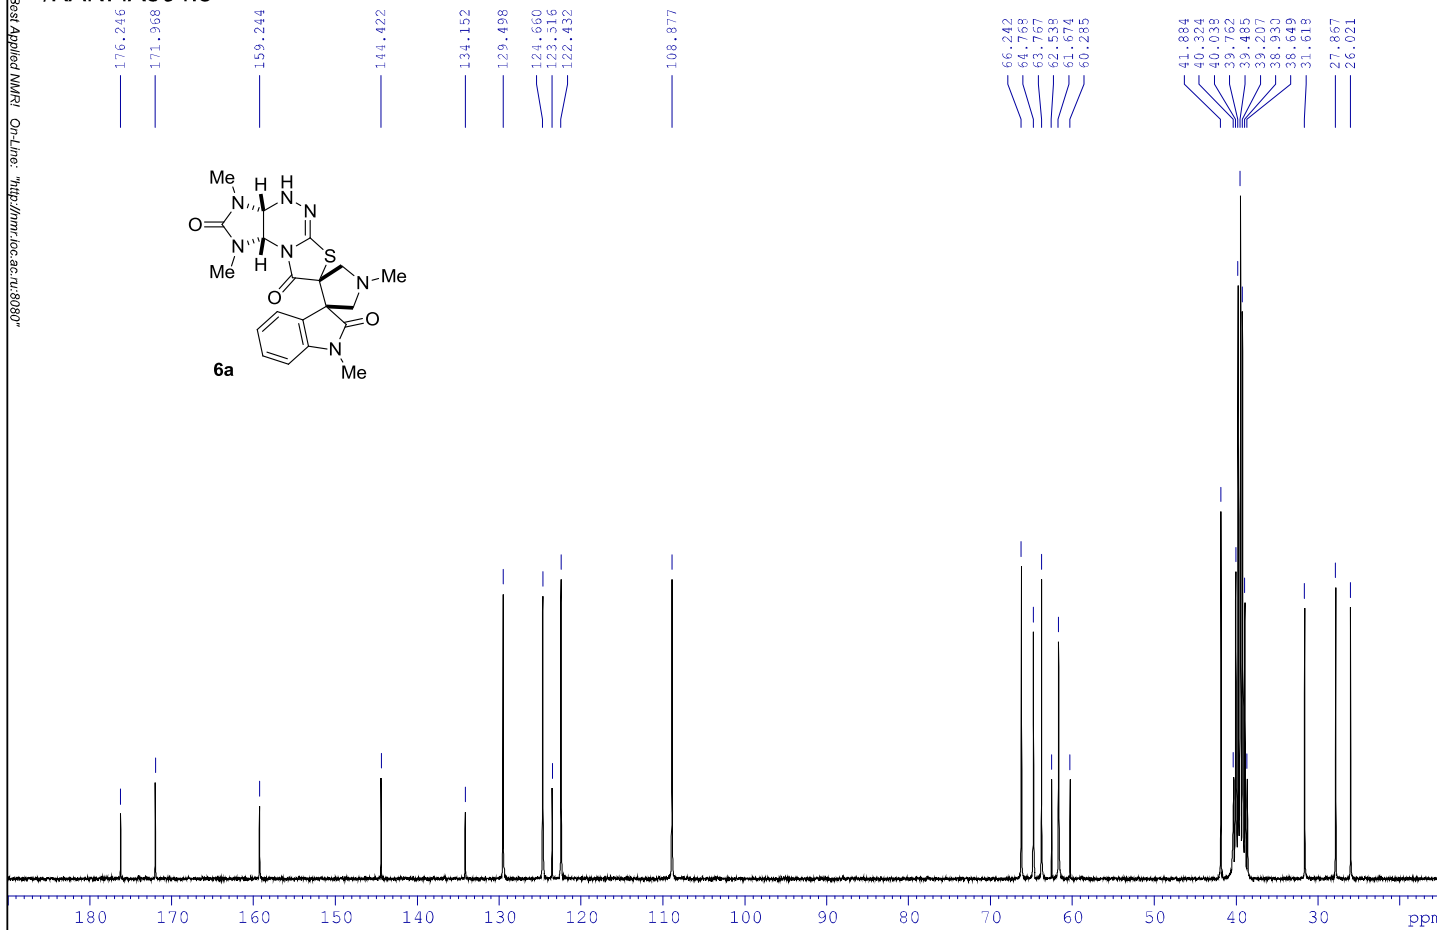

/KANI IA564.2  
NOESY

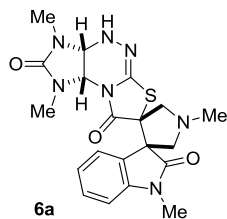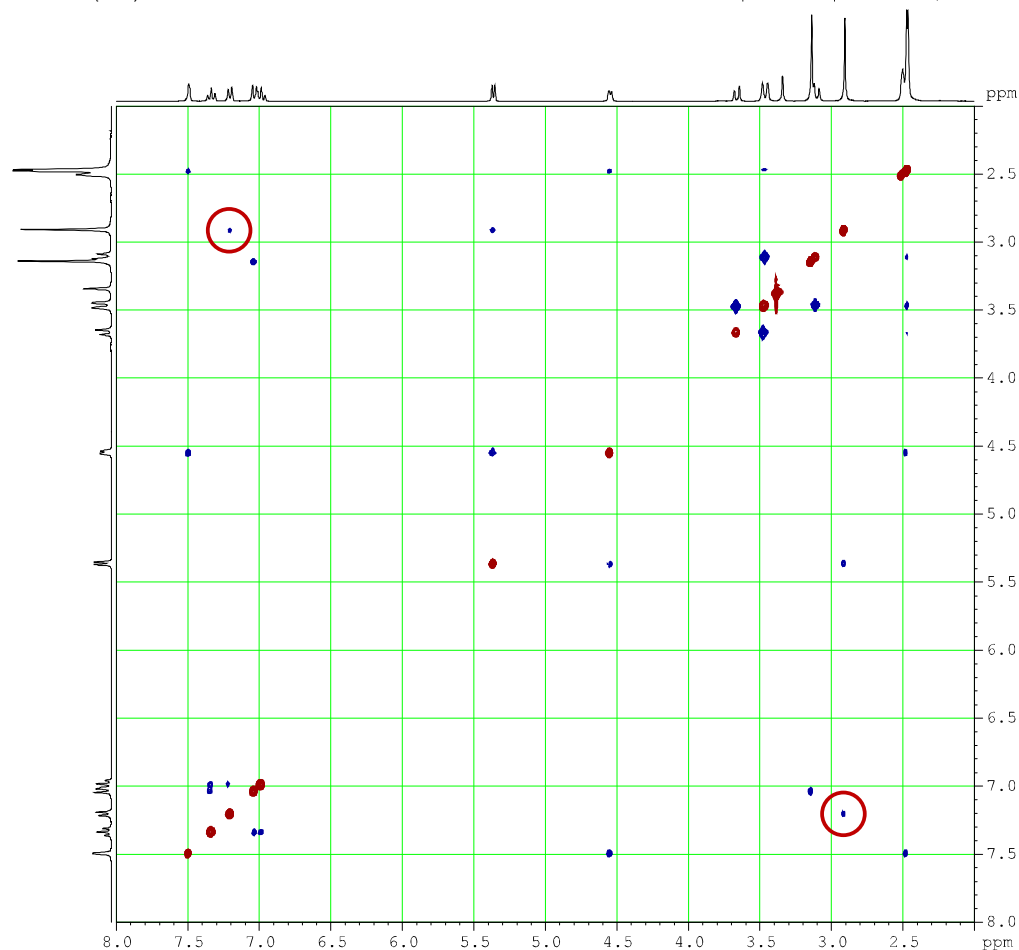

# /KANI KN56.3

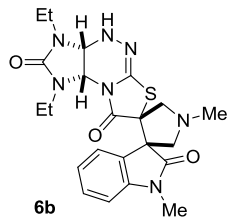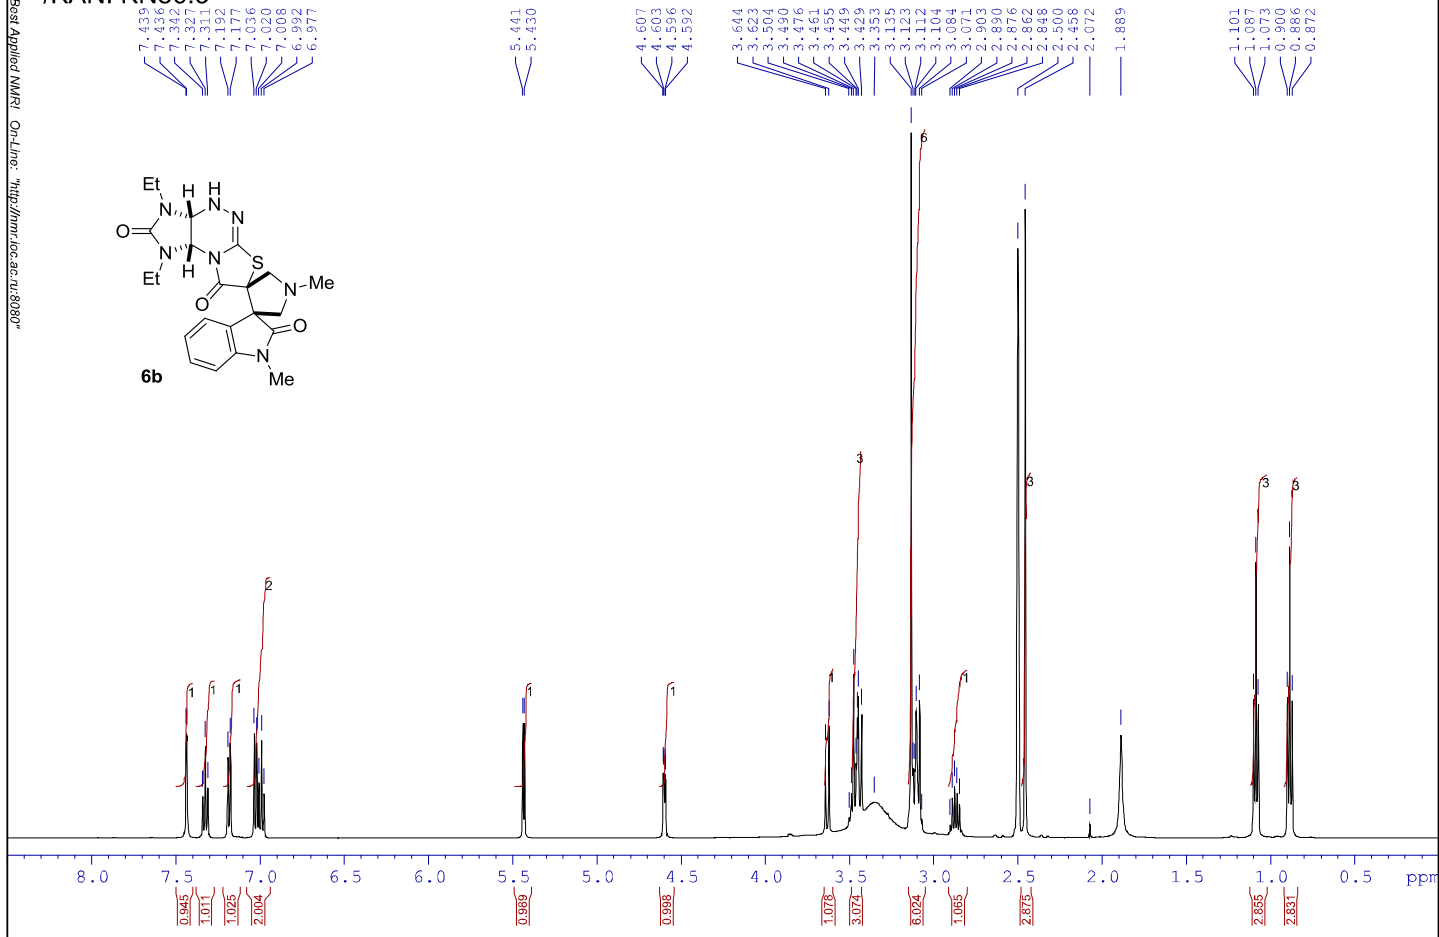

/KANI KN56.2

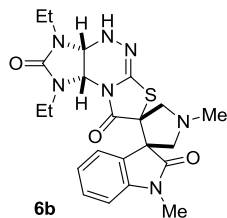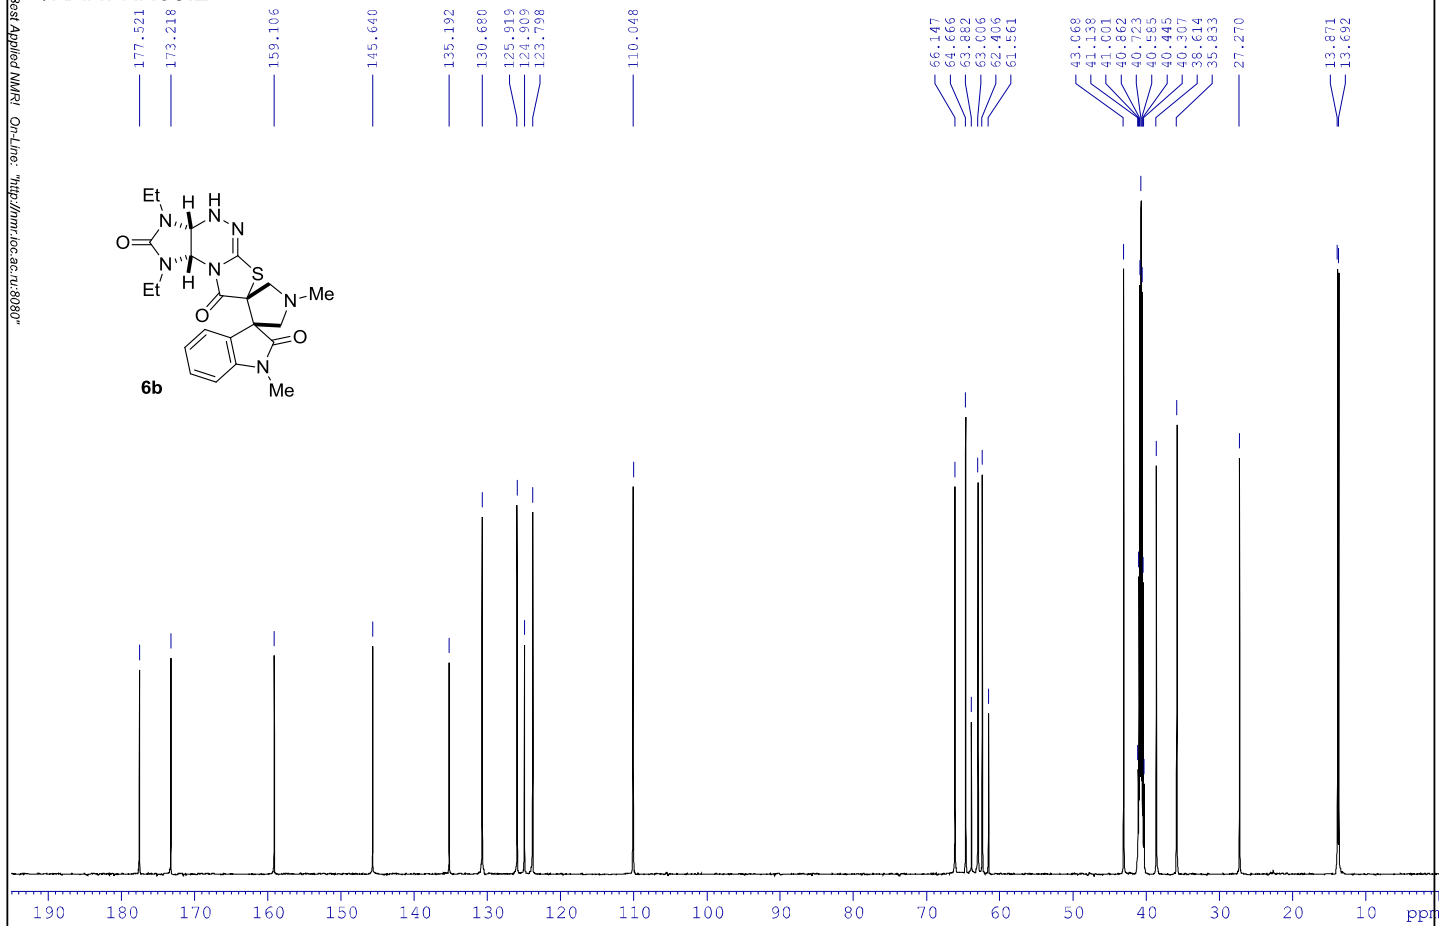

/KANI IA712.2

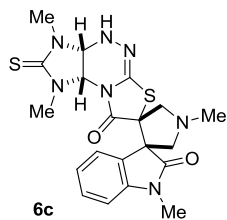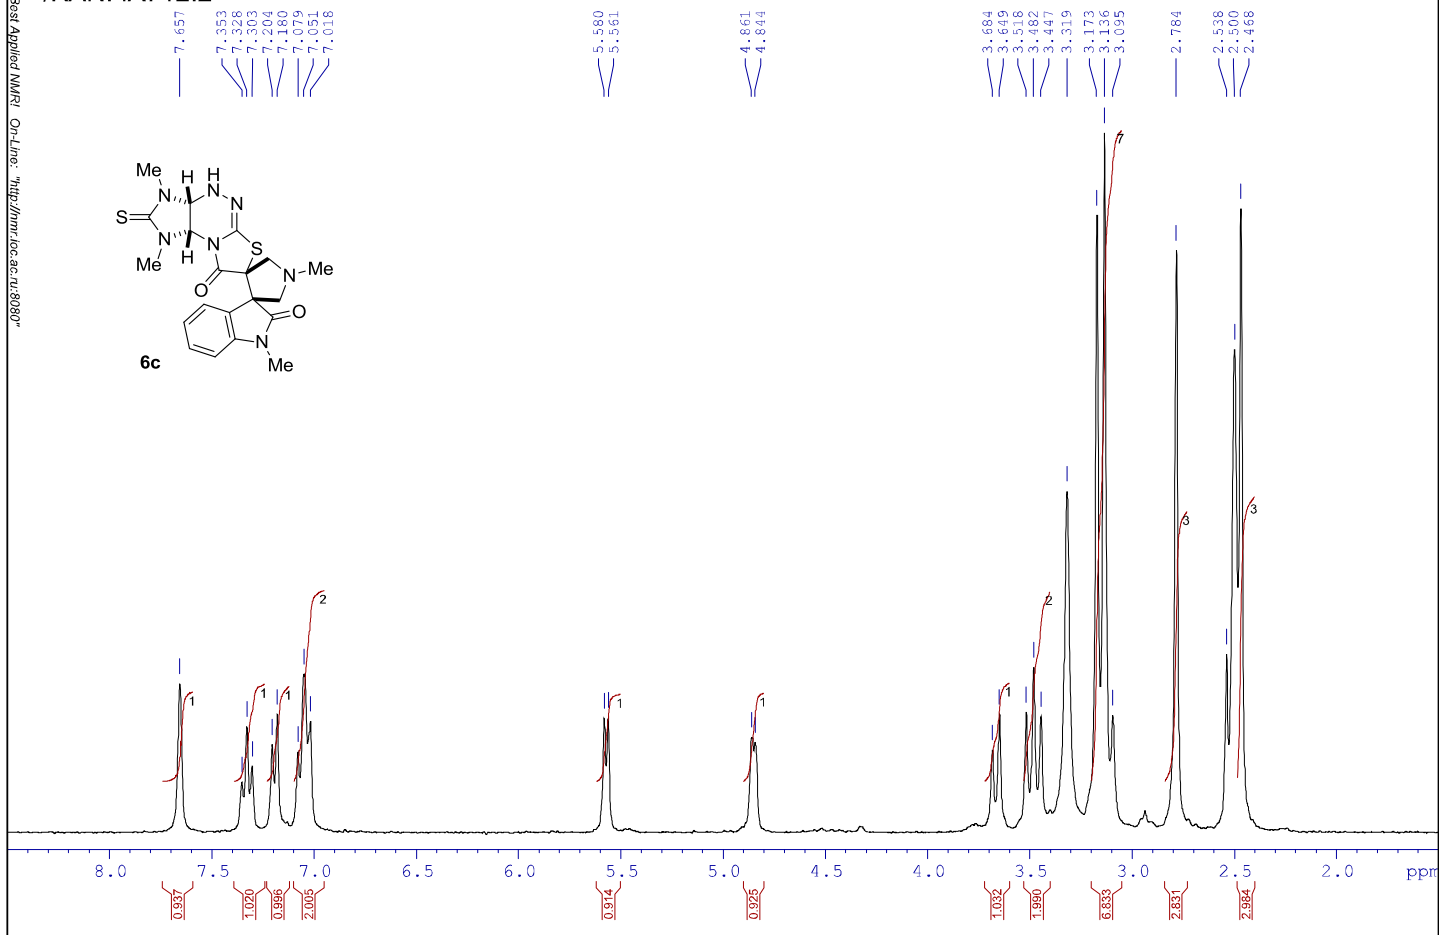

/KANI IA712.2

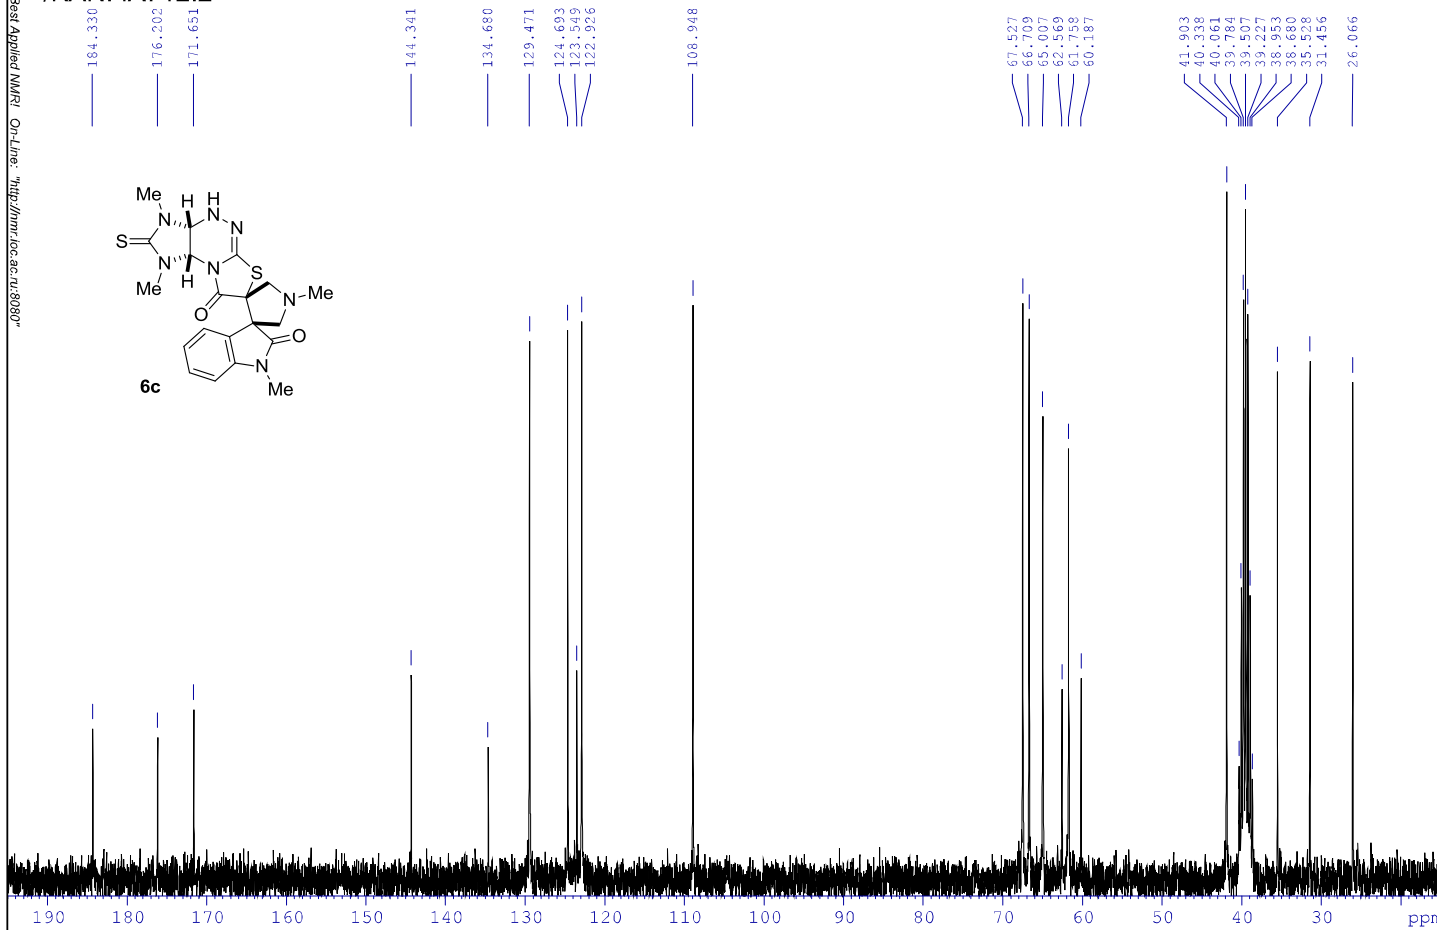



/KANI KN94.1

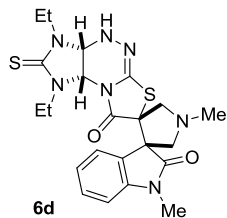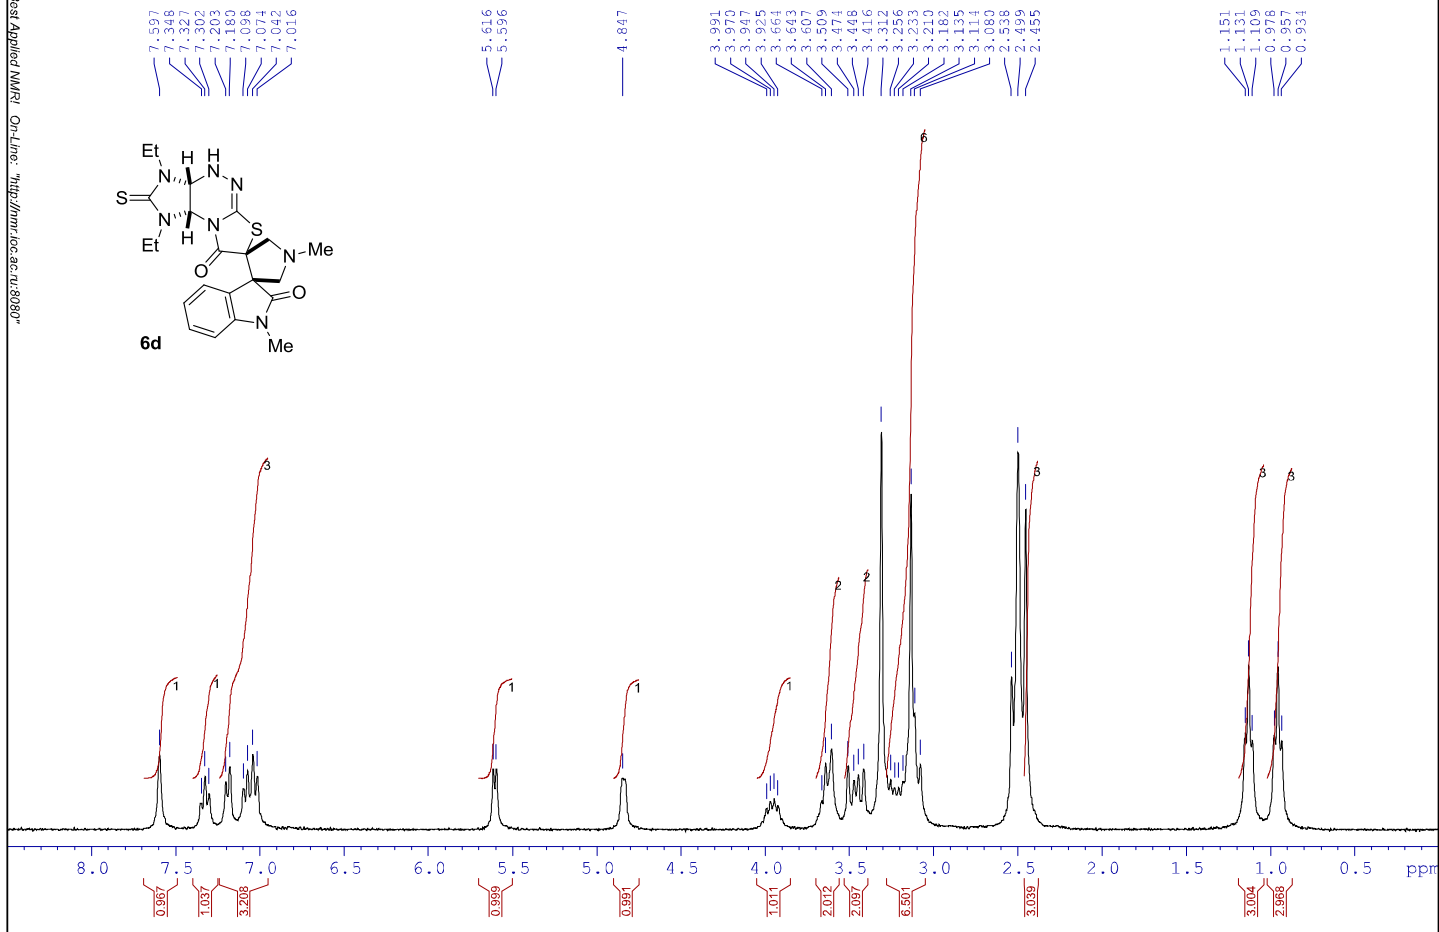

/KANI KN94.1/

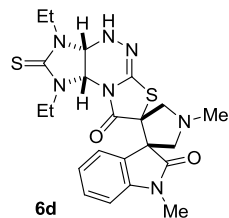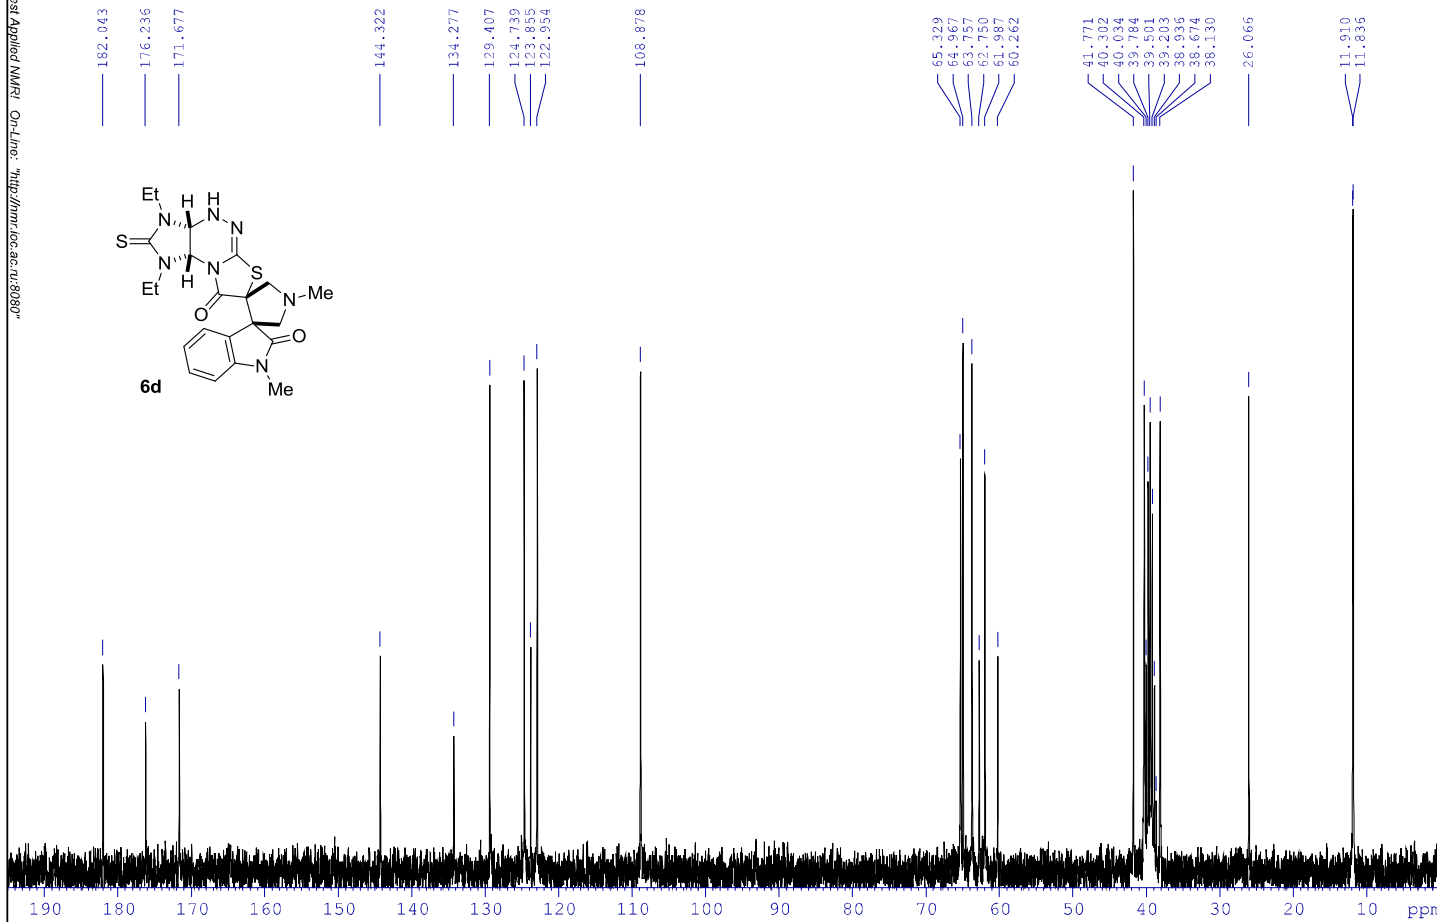

/KANI IA1566.3

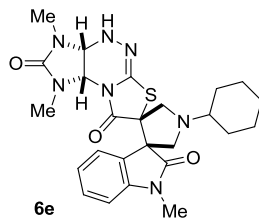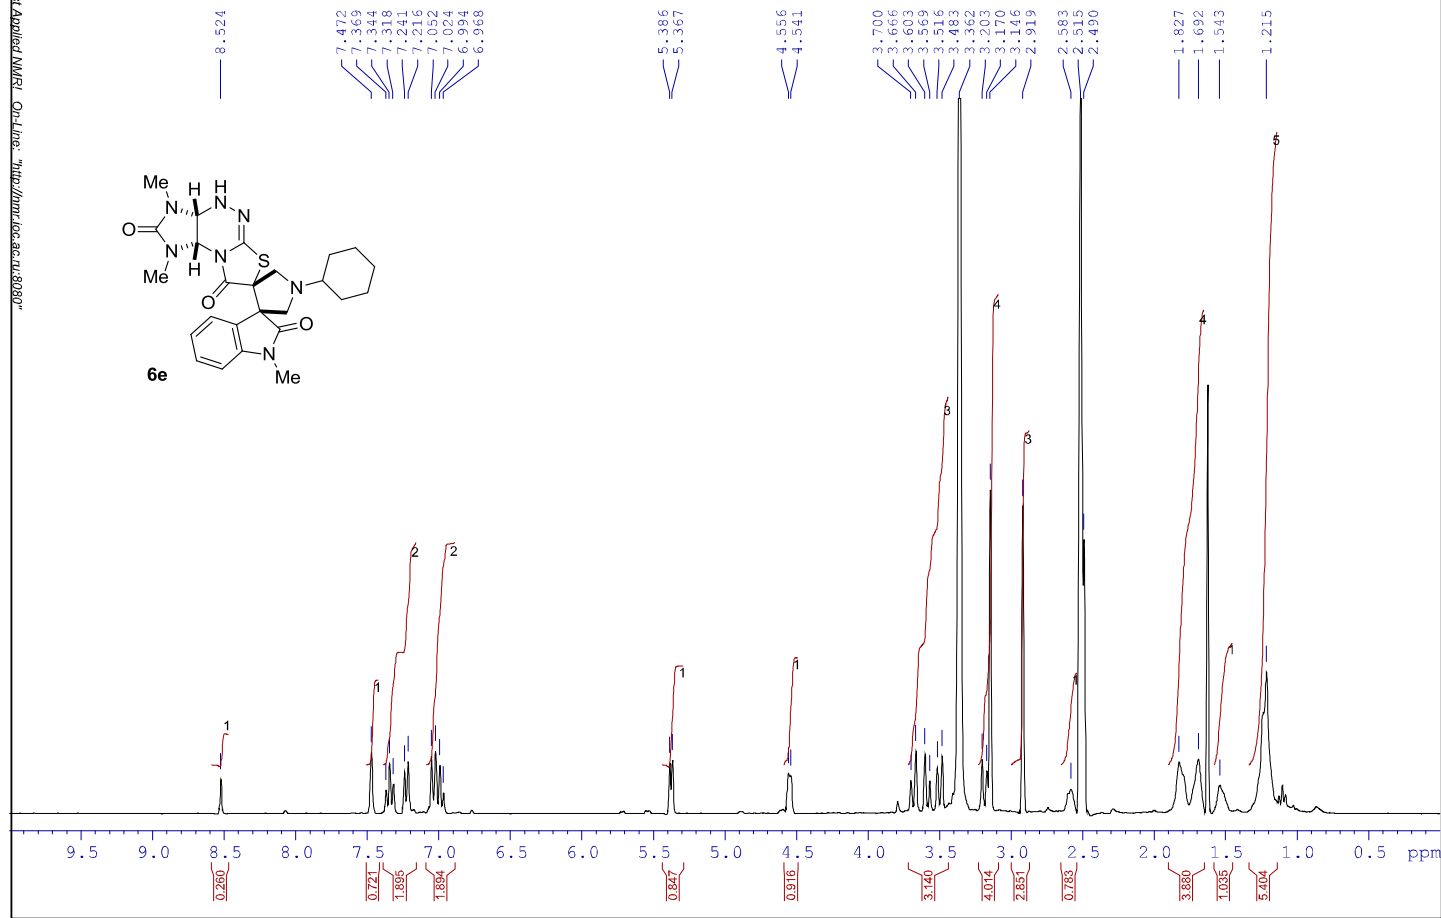

/KANI IA1566.3

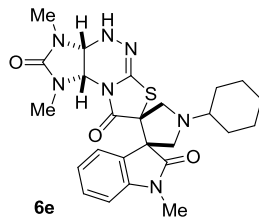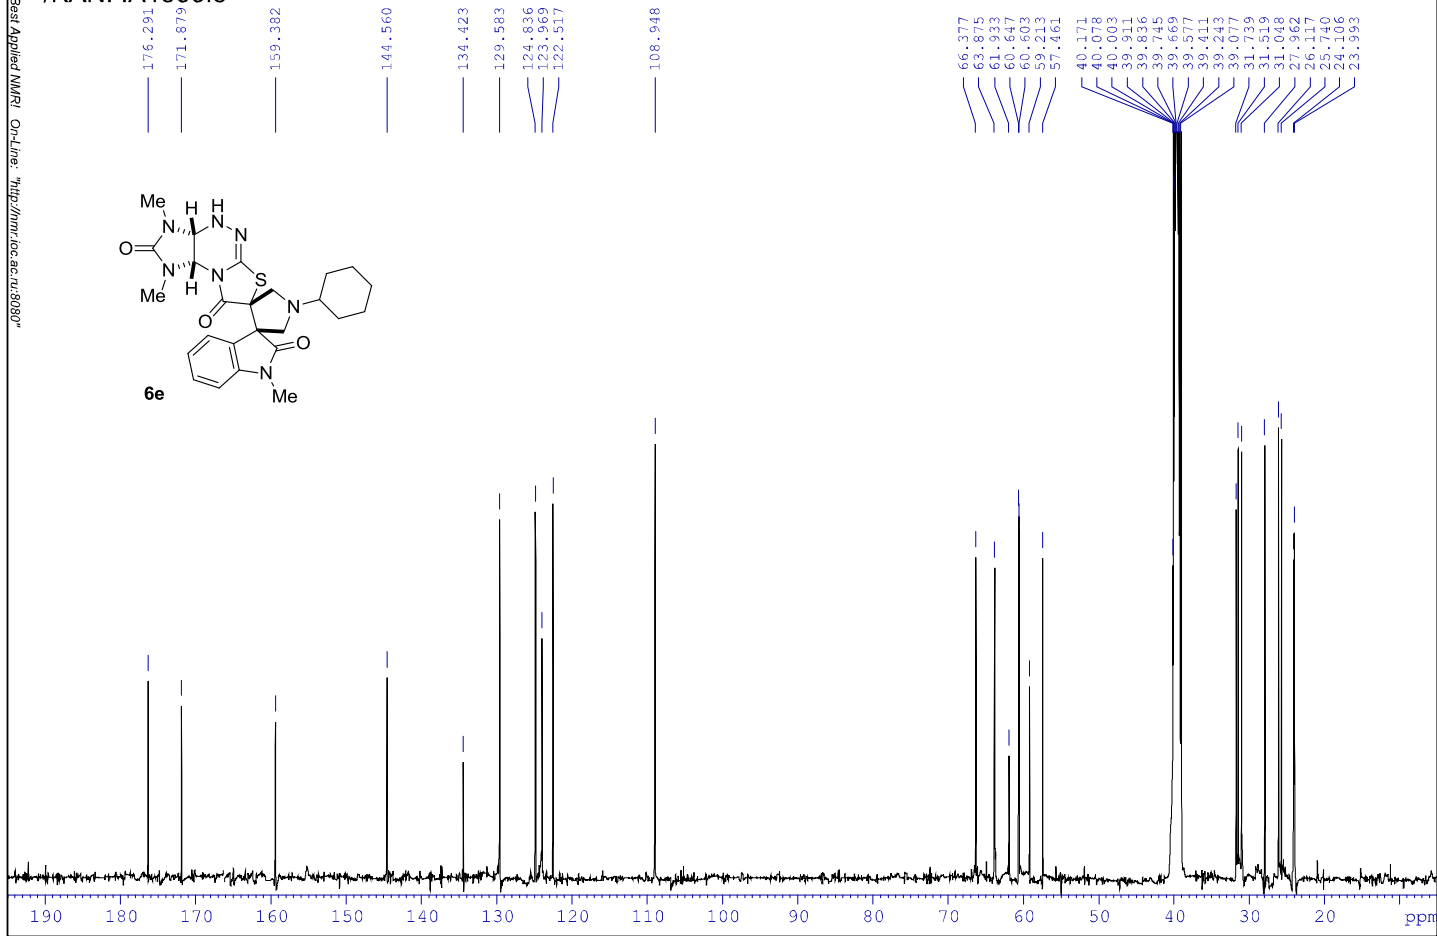

/KANI KN22.3

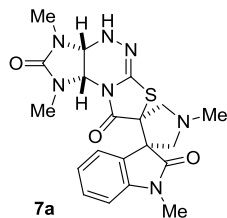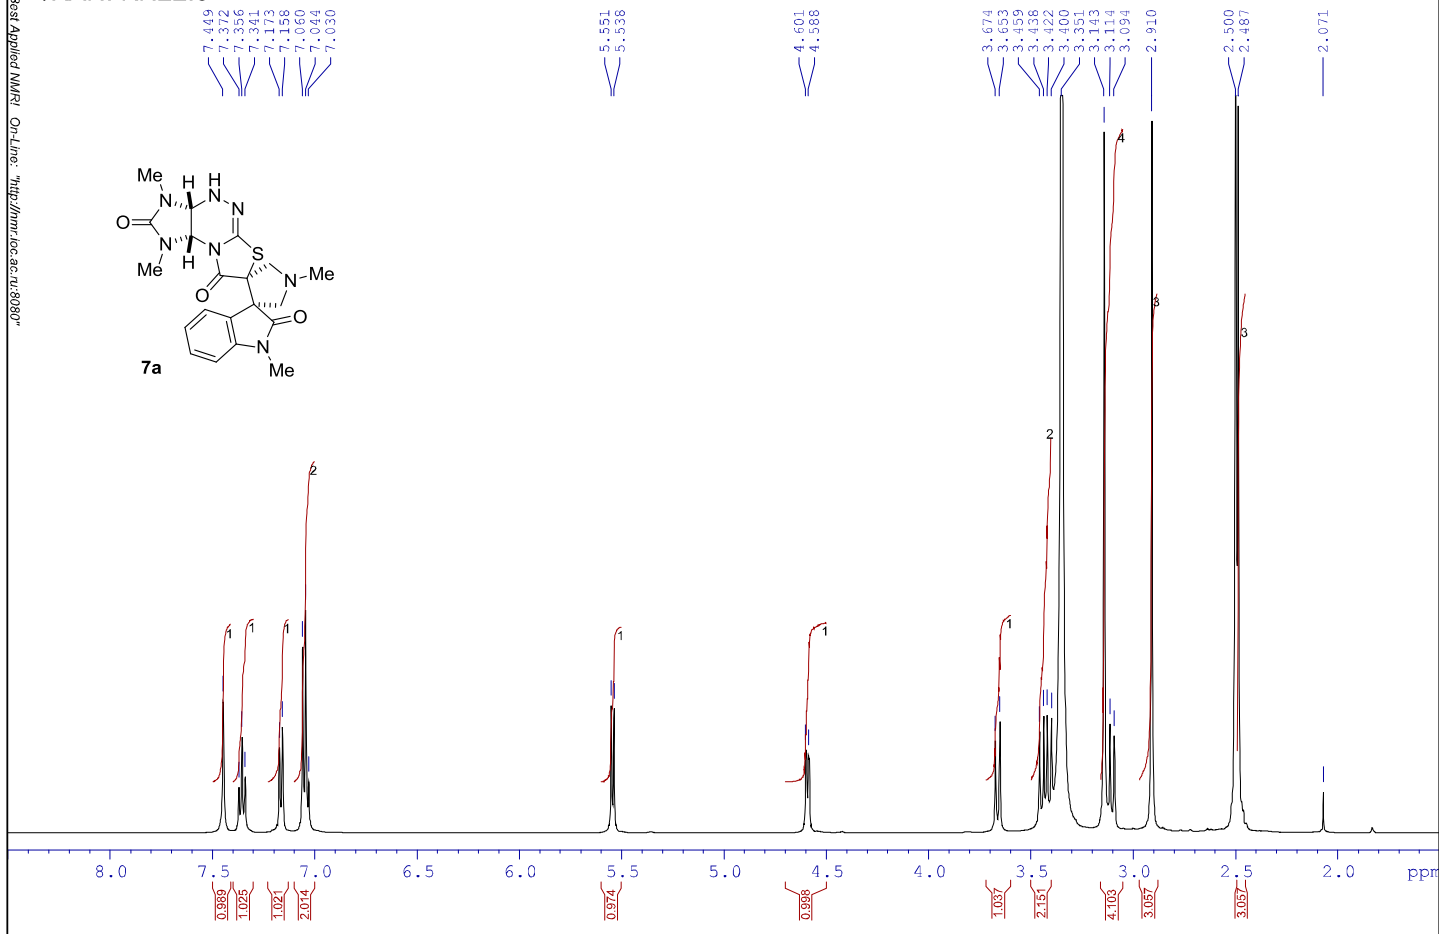

/KANI KN22.1/

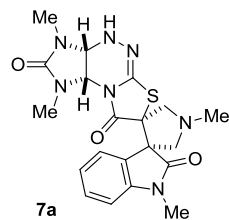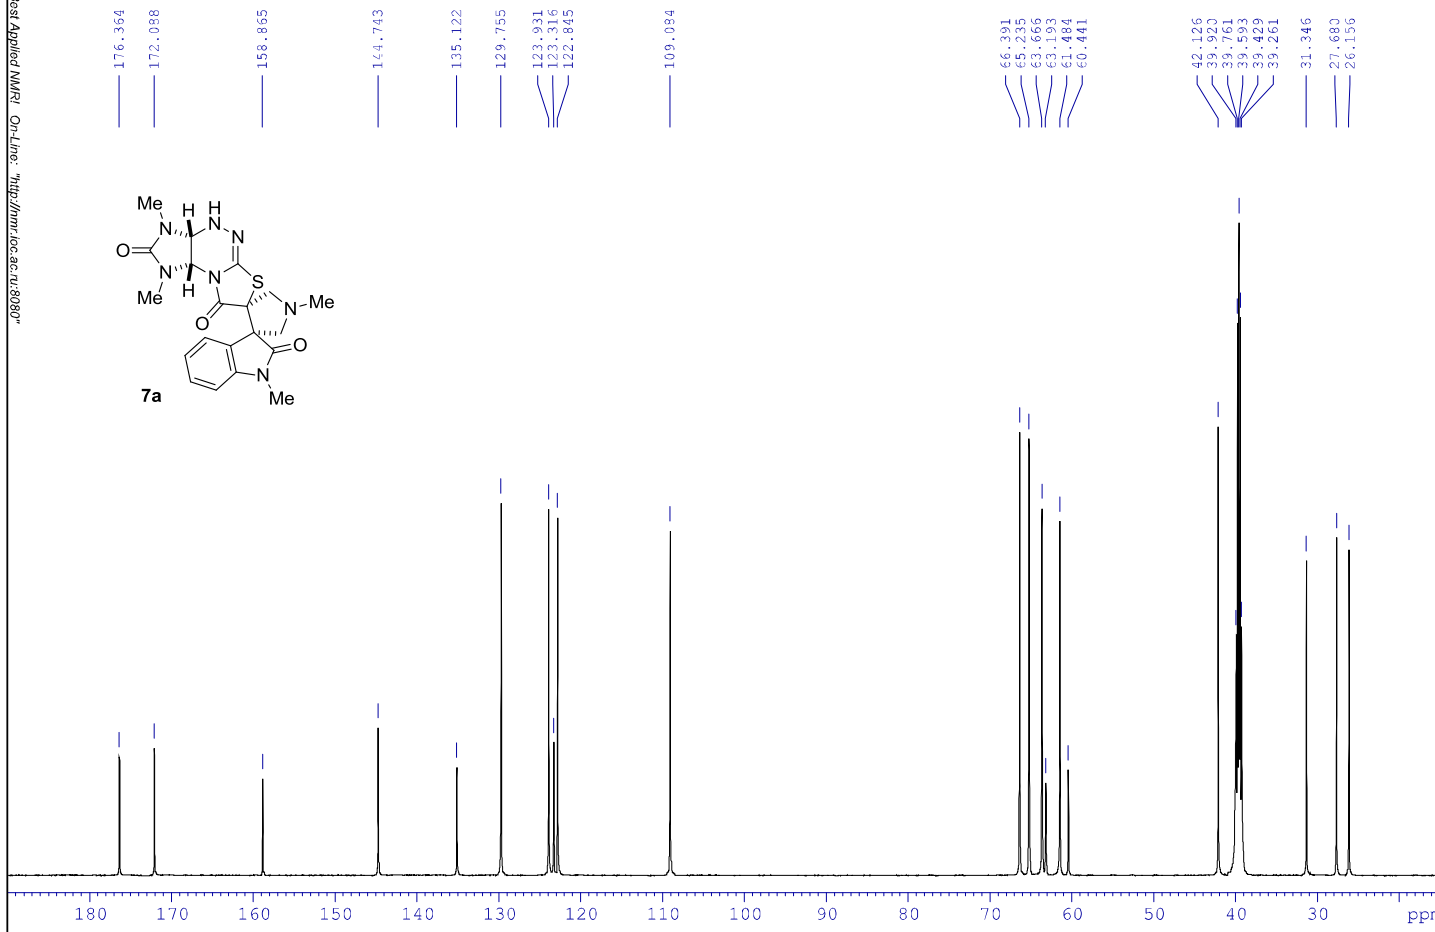

/KANI KN30.3

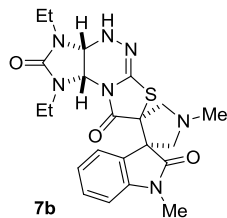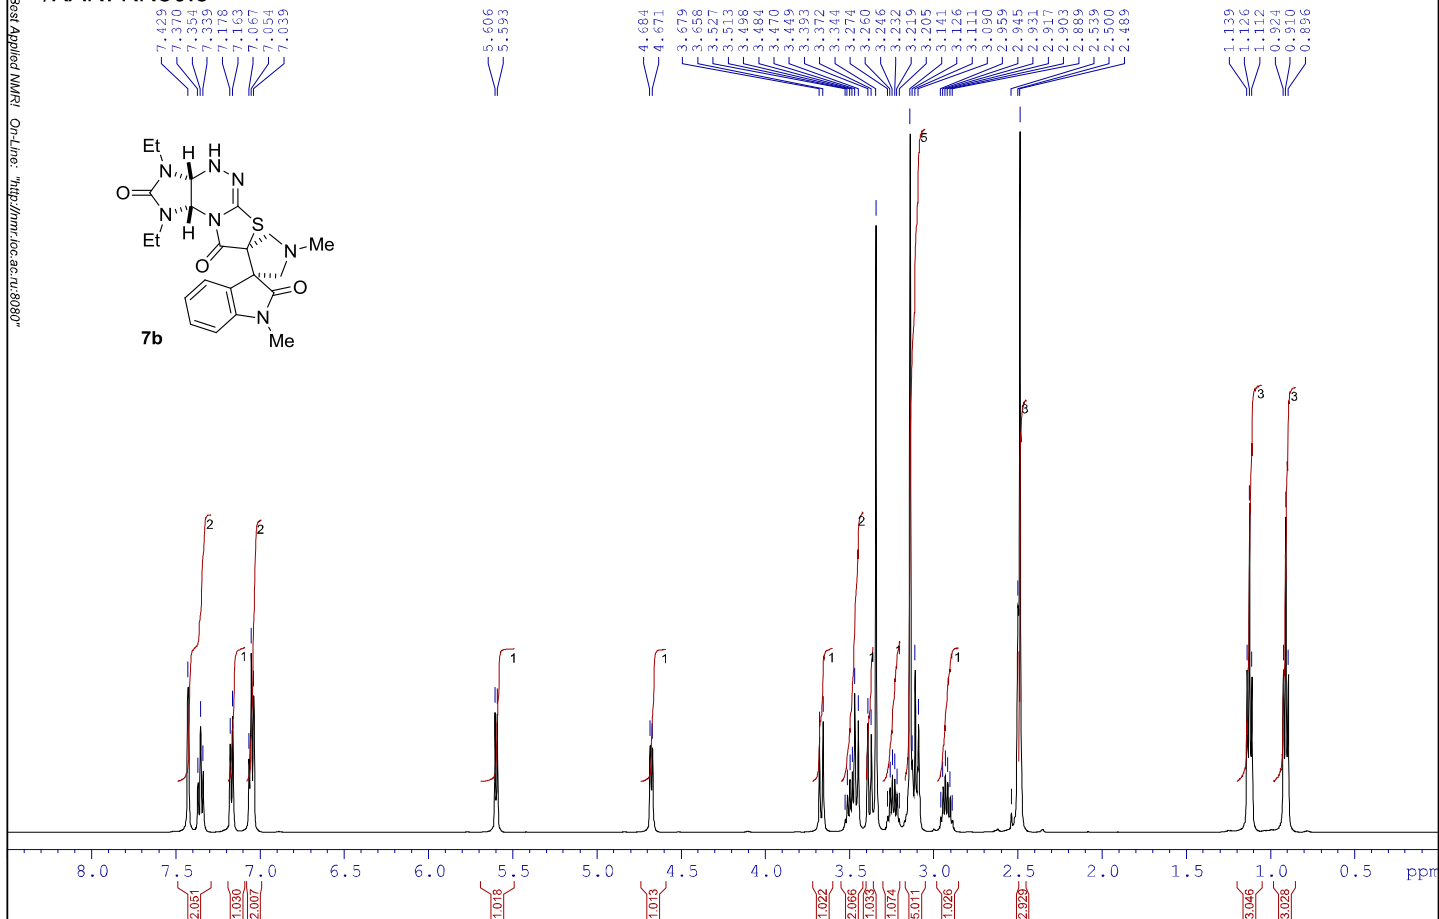

/KANI KN30.1

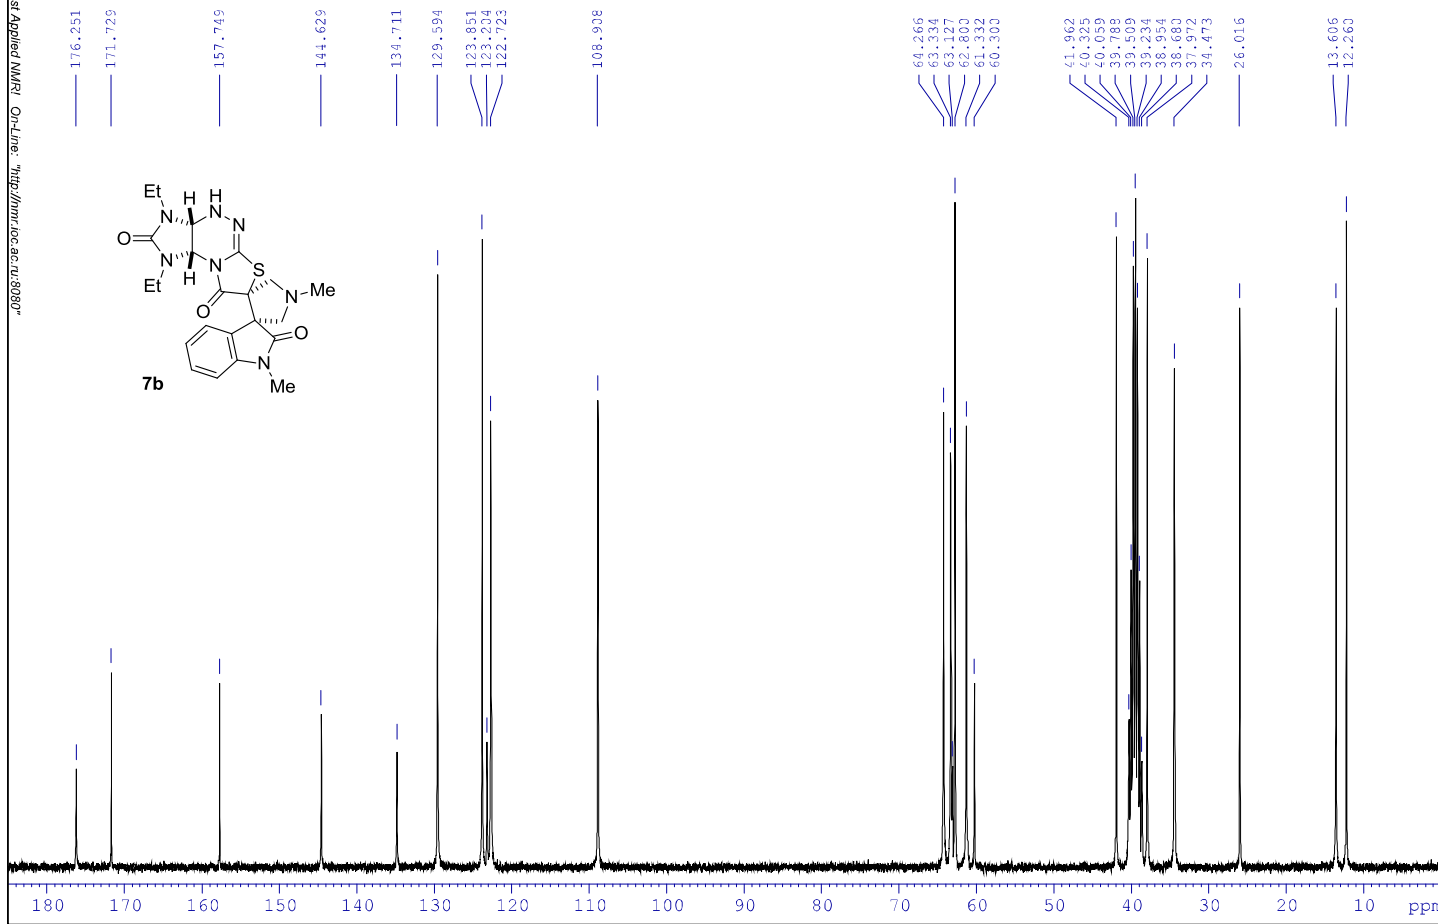



/KANI KN30.3  
NOESY

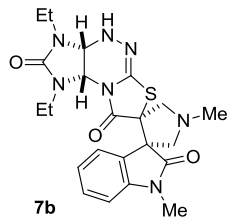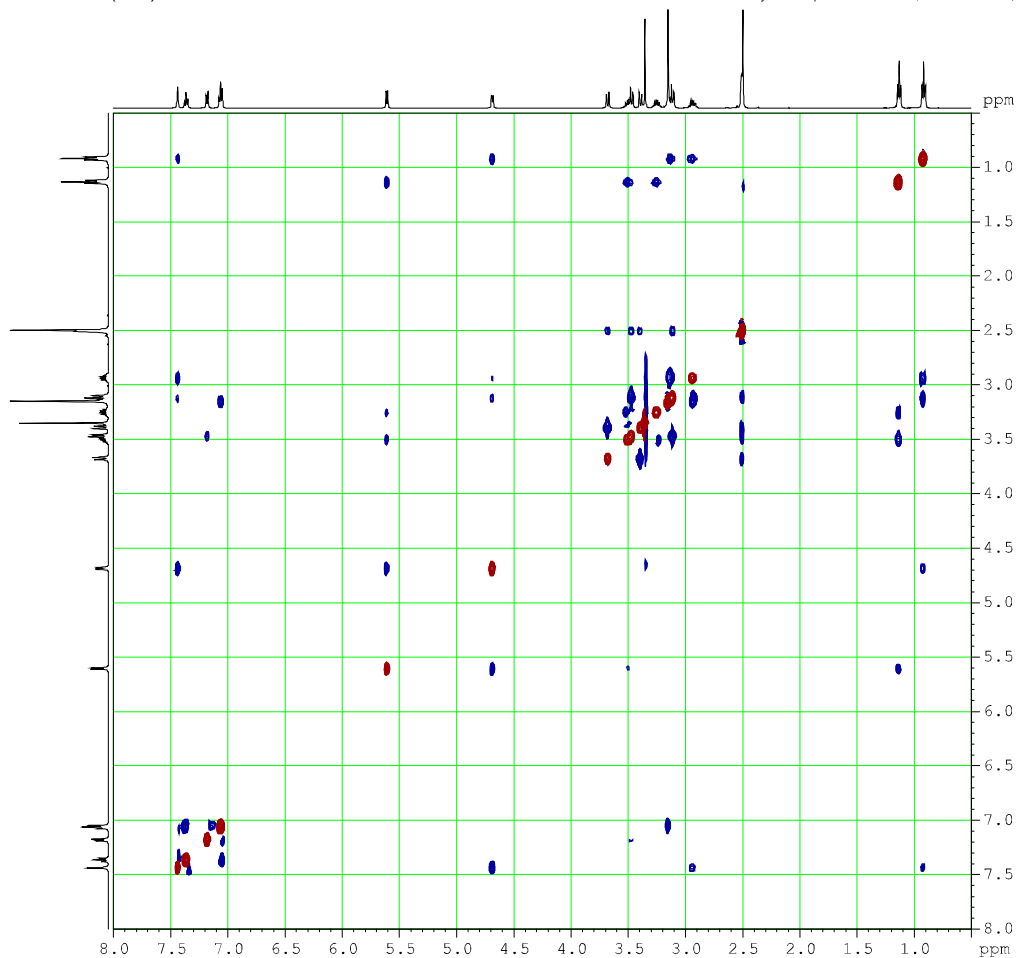

/KANI KN73.1

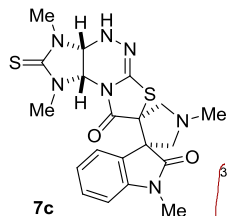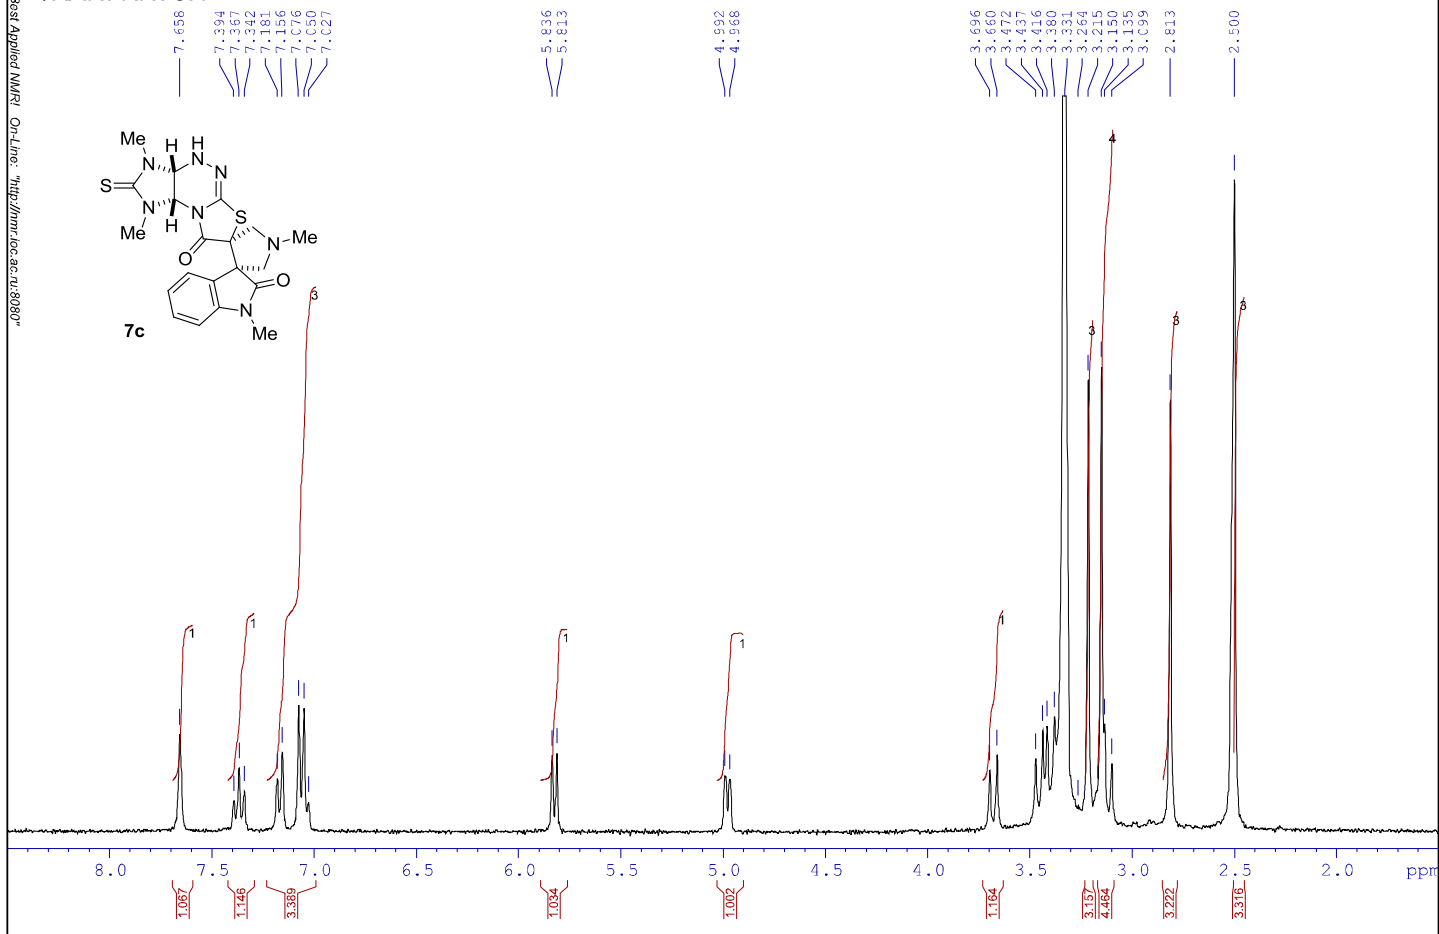

/KANI KN73.2

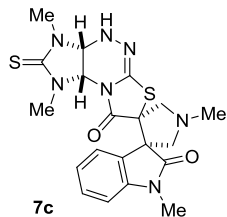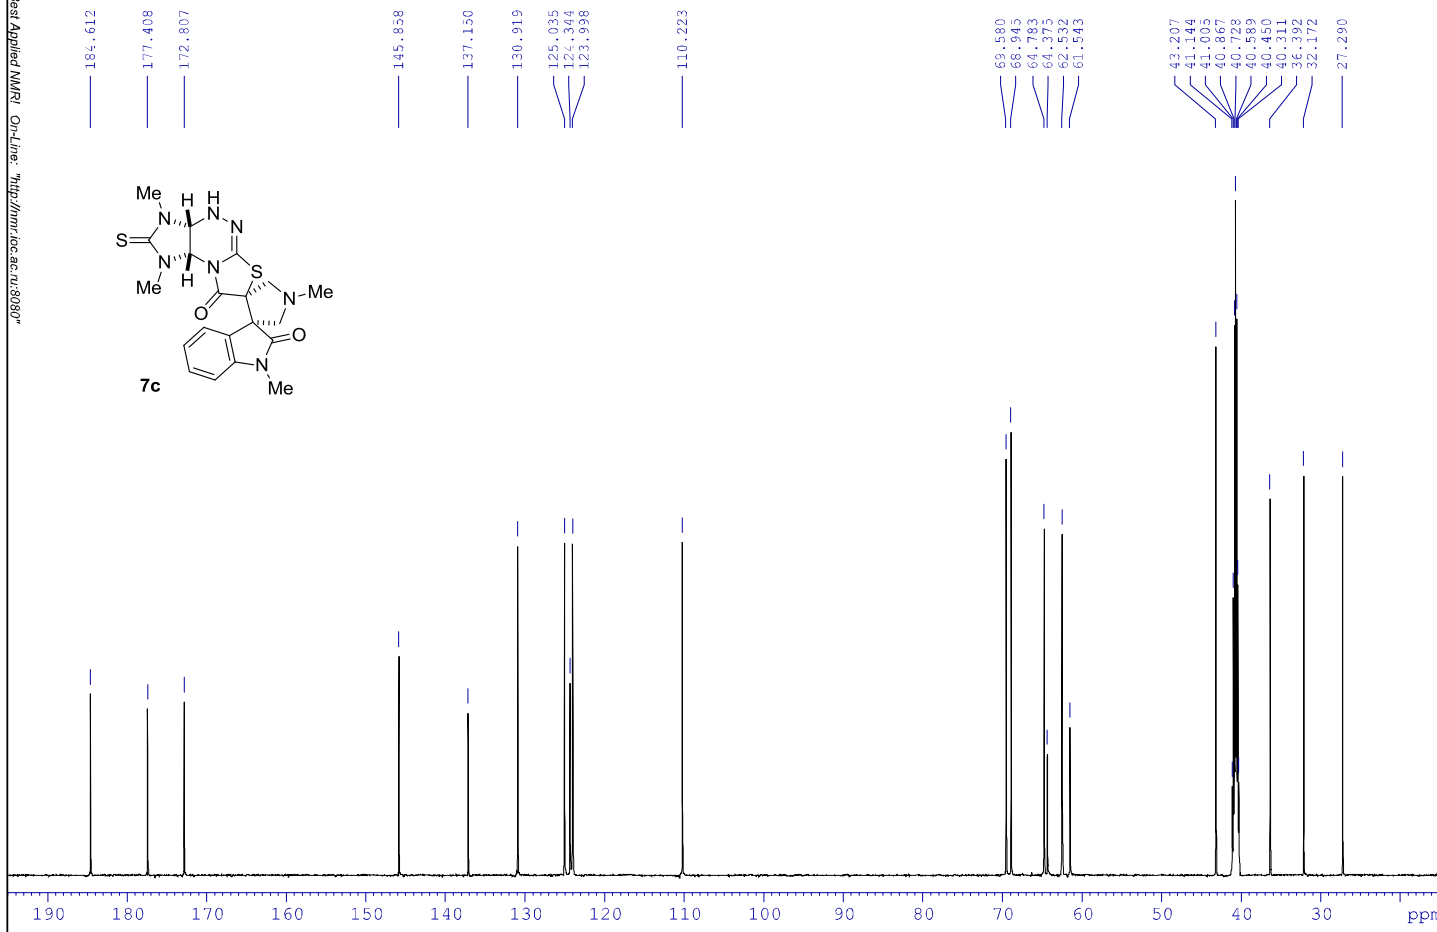

/KANI IA714.1

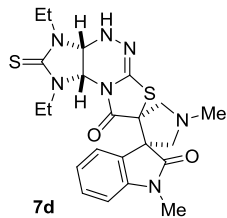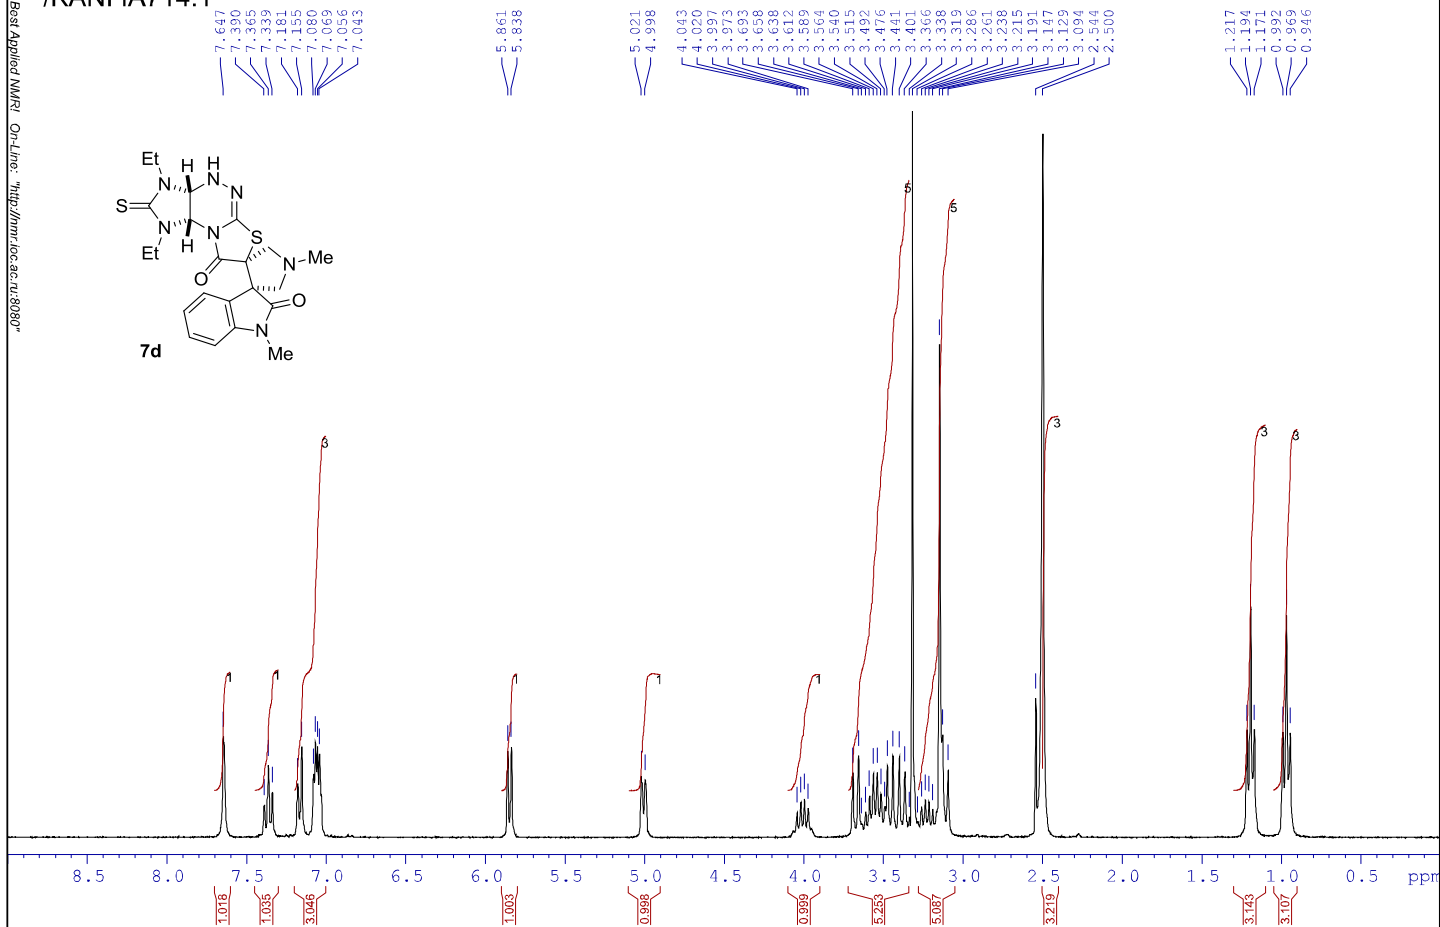

/KANI IA714.1

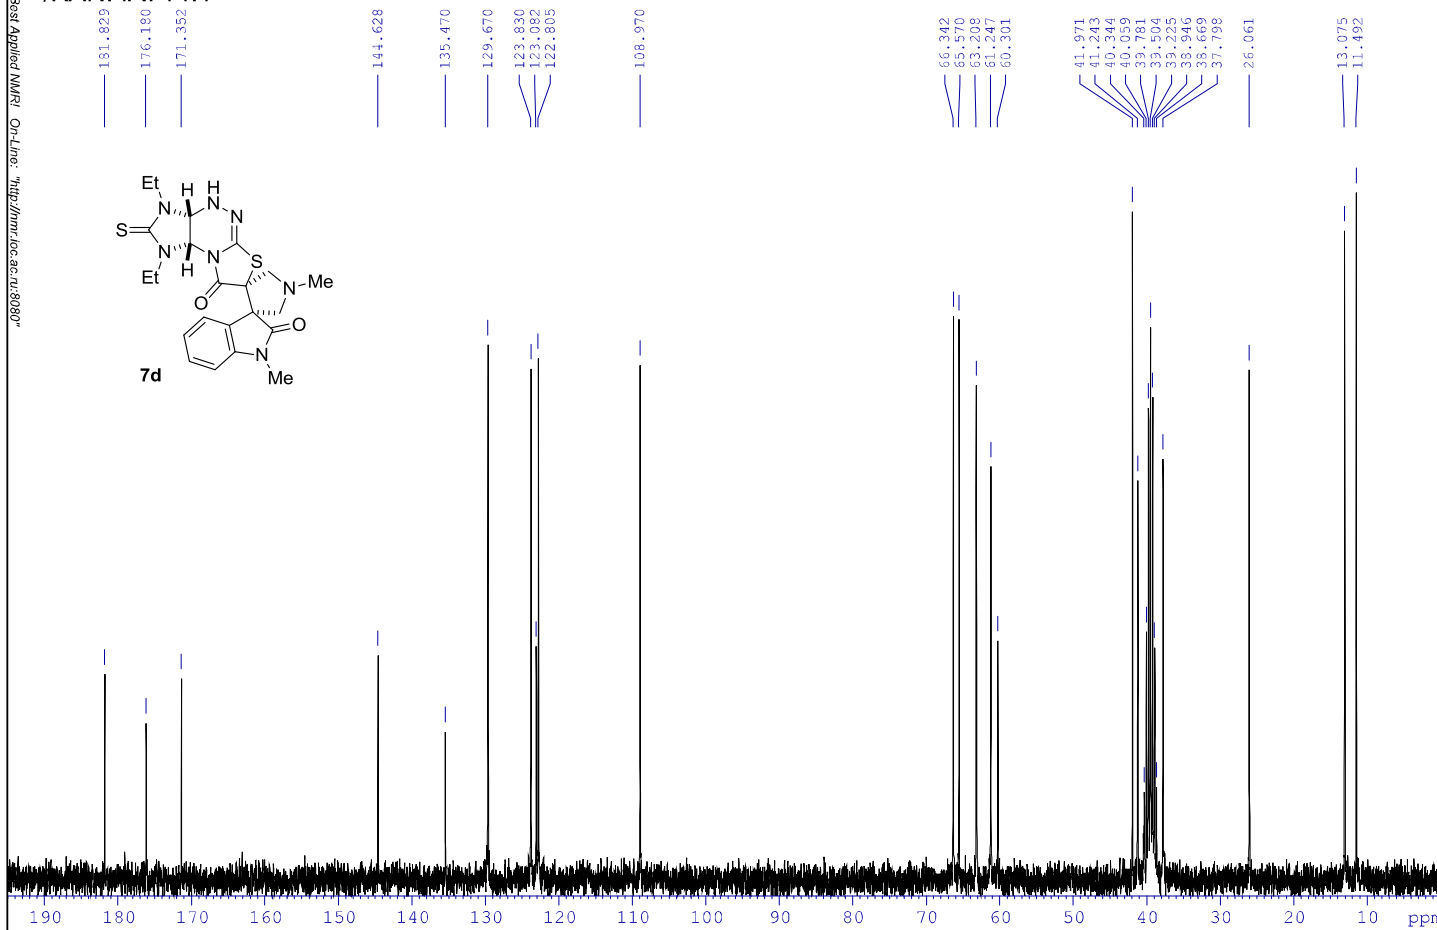

/KANI IA1557.4

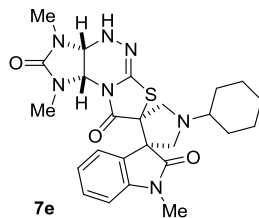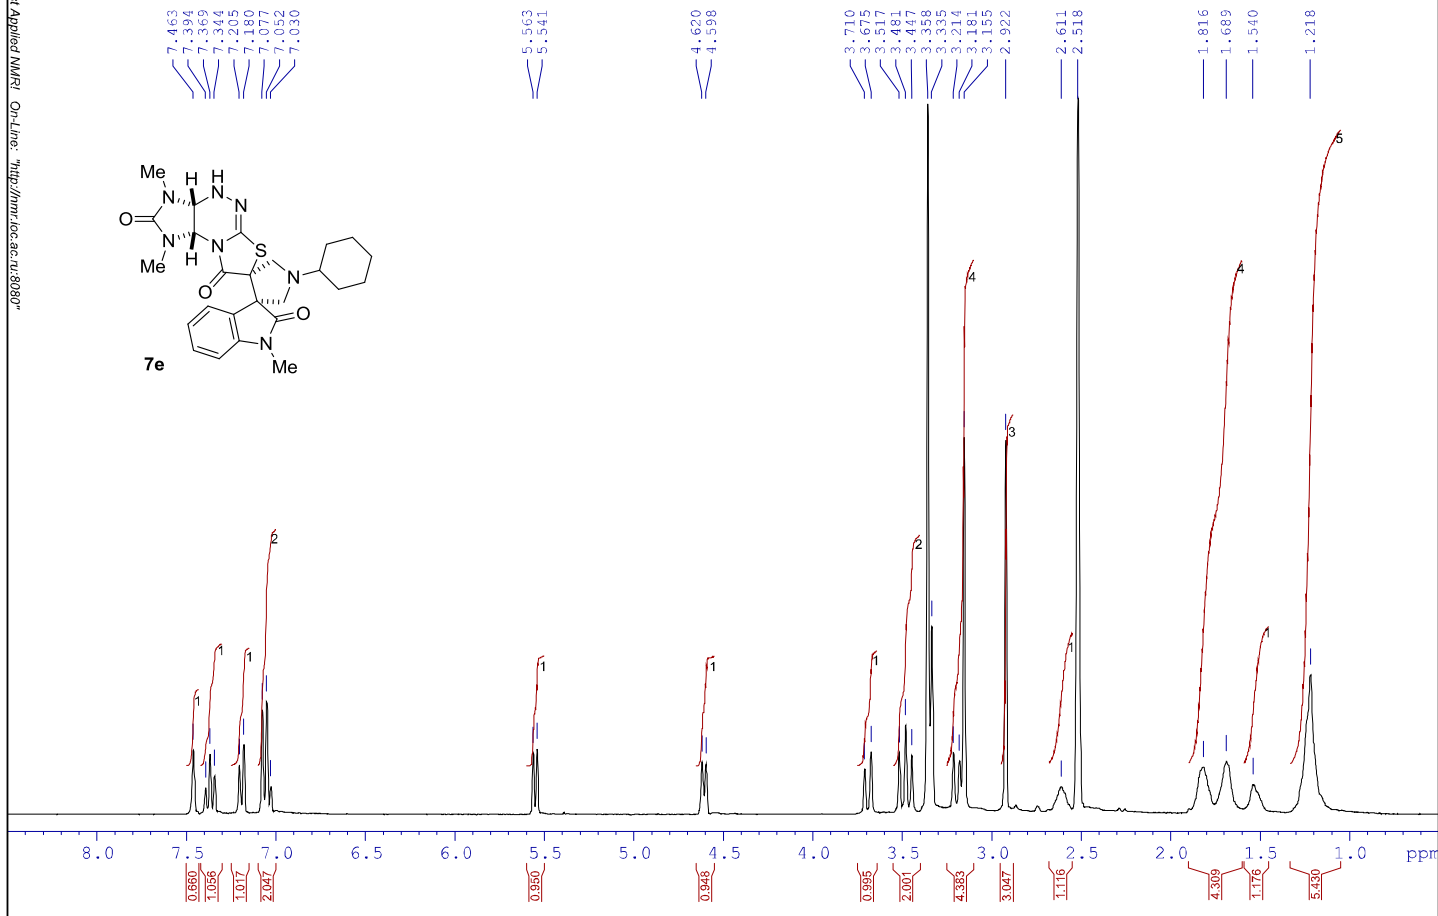

/KANI IA1557.4

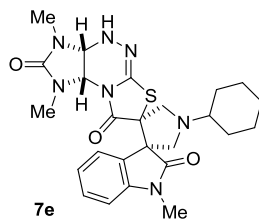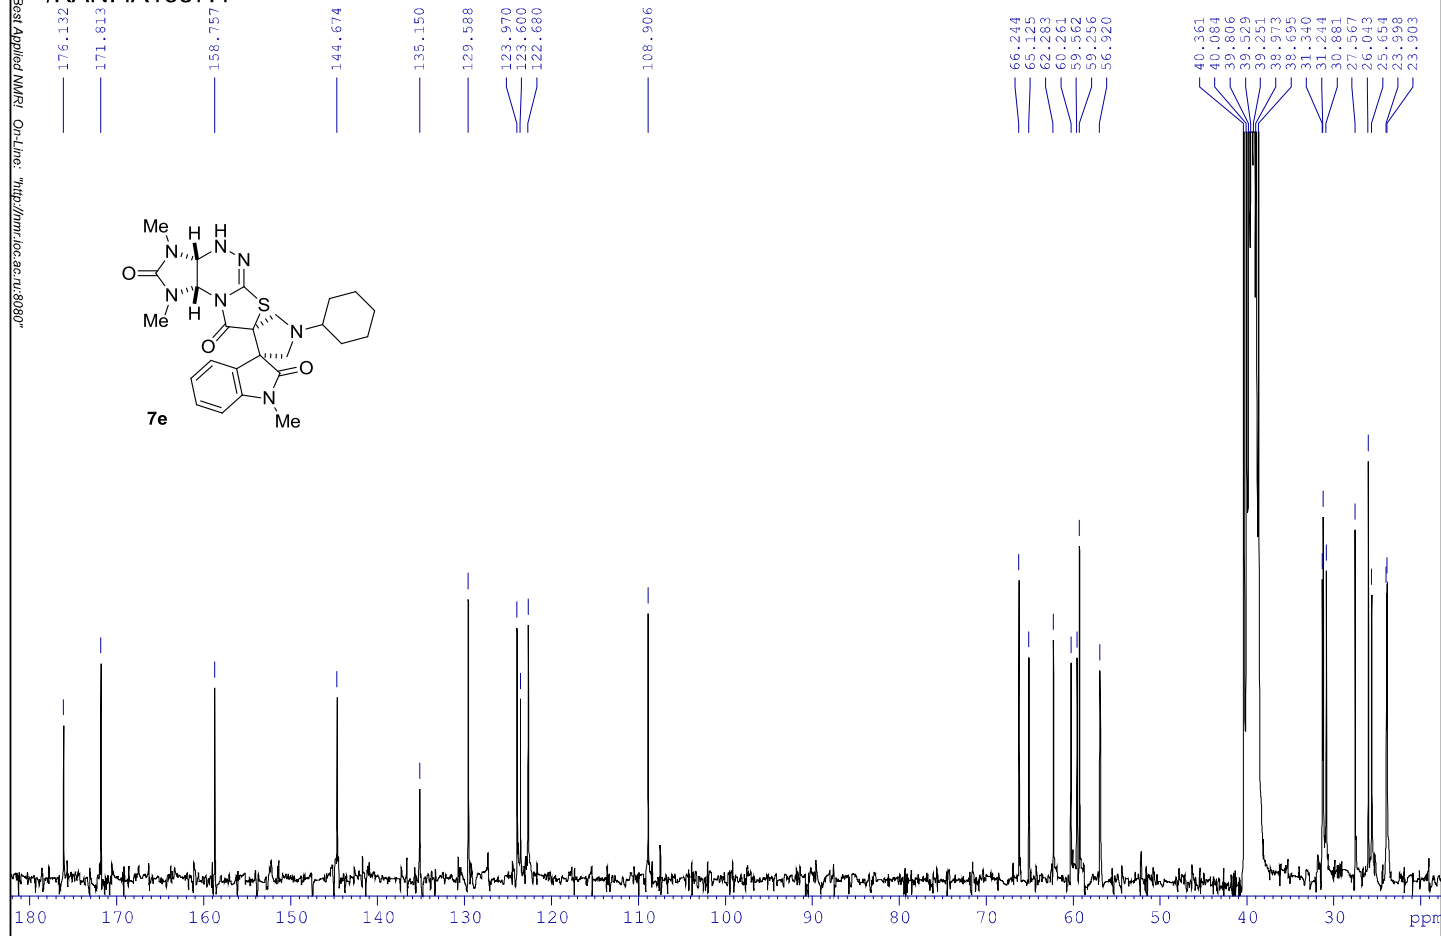

Supplement: s1 [file s1]
